# Supplementary material for: Methodology for task-shifting evidence-based psychological treatments to non-licenced/lay health workers: protocol for a systematic review
Source: PubMed Central journal article supplement — BMJ Open. 2021 Feb 1;11(2):e044012. doi: 10.1136/bmjopen-2020-044012 (PMC7852942; doi:10.1136/bmjopen-2020-044012), 2021-02-01
Supplement: bmjopen-2020-044012.draft_revisions.pdf [file bmjopen-2020-044012.draft_revisions.pdf]

# BMJ Open

BMJ Open is committed to open peer review. As part of this commitment we make the peer review history of every article we publish publicly available.

When an article is published we post the peer reviewers' comments and the authors' responses online. We also post the versions of the paper that were used during peer review. These are the versions that the peer review comments apply to.

The versions of the paper that follow are the versions that were submitted during the peer review process. They are not the versions of record or the final published versions. They should not be cited or distributed as the published version of this manuscript.

BMJ Open is an open access journal and the full, final, typeset and author-corrected version of record of the manuscript is available on our site with no access controls, subscription charges or pay-per-view fees (<http://bmjopen.bmj.com>).

If you have any questions on BMJ Open's open peer review process please email [info.bmjopen@bmj.com](mailto:info.bmjopen@bmj.com)

# BMJ Open

## Methodology for task-shifting evidence-based psychological treatments to non-licensed/lay health workers: Protocol for a systematic review

|                               |                                                                                                                                                                                                                                                                                                                                                                                                                                                                                                                                                                                                                                                                                                                                                                                                                                                                                                                                                                                                                                                                                                                                                                                                                                                                                                                                                                                                                                                                                 |
|-------------------------------|---------------------------------------------------------------------------------------------------------------------------------------------------------------------------------------------------------------------------------------------------------------------------------------------------------------------------------------------------------------------------------------------------------------------------------------------------------------------------------------------------------------------------------------------------------------------------------------------------------------------------------------------------------------------------------------------------------------------------------------------------------------------------------------------------------------------------------------------------------------------------------------------------------------------------------------------------------------------------------------------------------------------------------------------------------------------------------------------------------------------------------------------------------------------------------------------------------------------------------------------------------------------------------------------------------------------------------------------------------------------------------------------------------------------------------------------------------------------------------|
| Journal:                      | <i>BMJ Open</i>                                                                                                                                                                                                                                                                                                                                                                                                                                                                                                                                                                                                                                                                                                                                                                                                                                                                                                                                                                                                                                                                                                                                                                                                                                                                                                                                                                                                                                                                 |
| Manuscript ID                 | bmjopen-2020-044012                                                                                                                                                                                                                                                                                                                                                                                                                                                                                                                                                                                                                                                                                                                                                                                                                                                                                                                                                                                                                                                                                                                                                                                                                                                                                                                                                                                                                                                             |
| Article Type:                 | Protocol                                                                                                                                                                                                                                                                                                                                                                                                                                                                                                                                                                                                                                                                                                                                                                                                                                                                                                                                                                                                                                                                                                                                                                                                                                                                                                                                                                                                                                                                        |
| Date Submitted by the Author: | 19-Aug-2020                                                                                                                                                                                                                                                                                                                                                                                                                                                                                                                                                                                                                                                                                                                                                                                                                                                                                                                                                                                                                                                                                                                                                                                                                                                                                                                                                                                                                                                                     |
| Complete List of Authors:     | <p>Kanzler, Kathryn; UT Health San Antonio, Research to Advance Community Health (ReACH) Center; UT Health San Antonio, Psychiatry &amp; Behavioral Sciences</p> <p>Kilpela, Lisa; UT Health San Antonio, Research to Advance Community Health (ReACH) Center; UT Health San Antonio, Psychiatry &amp; Behavioral Sciences</p> <p>Pugh, Jaqueline; UT Health San Antonio, Department of Medicine, Division of General and Hospital Medicine</p> <p>Garcini, Luz; UT Health San Antonio, Research to Advance Community Health (ReACH) Center</p> <p>Gaspard, Christine; UT Health San Antonio, Briscoe Library, Long School of Medicine</p> <p>Aikens, James; University of Michigan Medical School, Family Medicine</p> <p>Reynero, Erick; UT Health San Antonio, Research to Advance Community Health (ReACH) Center</p> <p>Tsevat, Joel; UT Health San Antonio, Research to Advance Community Health (ReACH) Center; The University of Texas at Austin Dell Medical School</p> <p>Lopez, Eliot; UT Health San Antonio, Psychiatry &amp; Behavioral Sciences</p> <p>Johnson-Esparza, Yajaira; UT Health San Antonio, Family &amp; Community Medicine</p> <p>Ramirez, Amelie G.; UT Health San Antonio, Population Health Sciences; UT Health San Antonio, Institute for Health Promotion Research</p> <p>Finley, Erin; UT Health San Antonio, Department of Medicine, Division of General and Hospital Medicine; South Texas Veterans Health Care System, Research Service</p> |
| Keywords:                     | MENTAL HEALTH, PUBLIC HEALTH, Organisation of health services < HEALTH SERVICES ADMINISTRATION & MANAGEMENT                                                                                                                                                                                                                                                                                                                                                                                                                                                                                                                                                                                                                                                                                                                                                                                                                                                                                                                                                                                                                                                                                                                                                                                                                                                                                                                                                                     |
|                               |                                                                                                                                                                                                                                                                                                                                                                                                                                                                                                                                                                                                                                                                                                                                                                                                                                                                                                                                                                                                                                                                                                                                                                                                                                                                                                                                                                                                                                                                                 |

SCHOLARONE™  
Manuscripts

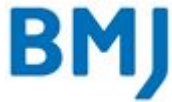

I, the Submitting Author has the right to grant and does grant on behalf of all authors of the Work (as defined in the below author licence), an exclusive licence and/or a non-exclusive licence for contributions from authors who are: i) UK Crown employees; ii) where BMJ has agreed a CC-BY licence shall apply, and/or iii) in accordance with the terms applicable for US Federal Government officers or employees acting as part of their official duties; on a worldwide, perpetual, irrevocable, royalty-free basis to BMJ Publishing Group Ltd ("BMJ") its licensees and where the relevant Journal is co-owned by BMJ to the co-owners of the Journal, to publish the Work in this journal and any other BMJ products and to exploit all rights, as set out in our [licence](#).

The Submitting Author accepts and understands that any supply made under these terms is made by BMJ to the Submitting Author unless you are acting as an employee on behalf of your employer or a postgraduate student of an affiliated institution which is paying any applicable article publishing charge ("APC") for Open Access articles. Where the Submitting Author wishes to make the Work available on an Open Access basis (and intends to pay the relevant APC), the terms of reuse of such Open Access shall be governed by a Creative Commons licence – details of these licences and which [Creative Commons](#) licence will apply to this Work are set out in our licence referred to above.

Other than as permitted in any relevant BMJ Author's Self Archiving Policies, I confirm this Work has not been accepted for publication elsewhere, is not being considered for publication elsewhere and does not duplicate material already published. I confirm all authors consent to publication of this Work and authorise the granting of this licence.

1  
2  
3  
4  
5  
6  
7  
8  
9  
10  
11  
12 Methodology for task-shifting evidence-based psychological treatments to non-licensed/lay  
13  
14 health workers: Protocol for a systematic review  
15  
16  
17  
18

19 Kathryn E. Kanzler<sup>1,2,3</sup>

20 Lisa Smith Kilpela<sup>1,2,4</sup>

21 Jaqueline Pugh<sup>5</sup>

22 Luz M. Garcini<sup>1,5</sup>

23 Christine Gaspard<sup>6</sup>

24 James E. Aikens<sup>7</sup>

25 Erick Reynero<sup>1</sup>

26 Joel Tsevat<sup>1,5</sup>

27 Eliot Lopez<sup>2,3</sup>

28 Yajaira Johnson-Esparza<sup>3</sup>

29 Amelie Ramirez<sup>8</sup>

30 Erin P. Finley<sup>1,5,2,9</sup>

- 31  
32  
33  
34  
35  
36  
37  
38  
39  
40  
41  
42  
43  
44  
45  
46  
47  
48  
49  
50 1. Research to Advance Community Health (ReACH) Center; University of Texas Health  
51 Science Center at San Antonio, San Antonio, TX, USA  
52 2. Department of Psychiatry & Behavioral Sciences; University of Texas Health Science  
53 Center at San Antonio, San Antonio, TX, USA  
54 3. Department of Family & Community Medicine; University of Texas Health Science  
55 Center at San Antonio, San Antonio, TX, USA  
56  
57  
58  
59  
60

- 1
- 2
- 3
- 4 4. Barshop Institute for Longevity and Aging Studies, University of Texas Health Science
- 5 Center at San Antonio, San Antonio, TX, USA
- 6
- 7 5. Department of Medicine, University of Texas Health Science Center at San Antonio, San
- 8 Antonio, TX, USA
- 9
- 10 6. Briscoe Library, Long School of Medicine, University of Texas Health Science Center at
- 11 San Antonio, San Antonio, TX, USA
- 12
- 13 7. Department of Family Medicine, University of Michigan, Ann Arbor, MI, USA
- 14
- 15 8. Department of Population Health Sciences, University of Texas Health Science Center at
- 16 San Antonio, San Antonio, TX, USA
- 17
- 18 9. South Texas Veterans Healthcare System, San Antonio, TX, USA

17 **Corresponding author:** Kathryn E. Kanzler, PsyD, ABPP, Research to Advance Community  
18 Health (ReACH) Center, University of Texas Health Science Center San Antonio, 7703 Floyd  
19 Curl Dr, Mail Code 7768, San Antonio, TX 78229, USA

20 Email: [Kanzler@uthscsa.edu](mailto:Kanzler@uthscsa.edu)

21  
22  
23  
24 Word count: 2081

## ABSTRACT

**Introduction:** “Task-shifting” or “task-sharing” is an effective strategy for delivering behavioral health care in lower-resource communities. However, little is known regarding the actual steps (methods) in carrying out a task-shifting project. This paper presents a protocol for a systematic review that will identify steps in adapting an evidence-based psychological treatment for delivery by lay/non-licensed personnel.

**Methods and analysis:** This protocol was developed following the 2015 guidelines of the Preferred Reporting Items for Systematic Review and Meta-analysis Protocols. We outline planned eligibility criteria, information sources, search strategy, study screening and selection, data extraction, risk of bias assessment, and data synthesis and analysis.

**Ethics and dissemination:** This review will analyze data from published studies only, thus it will not require Institutional Board Review. Findings will be presented at conferences and the final systematic review will be published in a peer-reviewed journal.

**Key Words:** Task-shifting; evidence-based psychological treatment; lay health worker; treatment delivery

### Article Summary

Strengths & limitations:

- This protocol describes a planned systematic review to identify best-practices for task-shifting evidence-based psychological treatments to non-licensed/lay health workers
- We will use established operationalized terms to identify and describe implementation strategies
- Studies will be identified via a thorough search strategy using independent data extraction techniques, with risk of bias mitigation strategies
- This protocol adheres to the 17-item checklist, Preferred Reporting Items for Systematic review and Meta-analysis Protocols (PRISMA-P)
- The review will only include studies in English and focuses on non-licensed/lay health workers (e.g., not nurses or teachers), and identifies only studies examining delivery of psychological treatments (i.e., not education or other programming).

## INTRODUCTION

Mental health disorders are common worldwide<sup>1</sup> and although there are evidence-based psychological treatments (EBPTs) that improve health outcomes, most of the people who need treatment do not receive it.<sup>2</sup> Mental health treatment is often provided by licensed mental health professionals in specialty settings<sup>3</sup>. These specialty providers may not be available due to workforce shortages, cost of care, and/or access difficulty, especially for lower-income and economically challenged populations<sup>4</sup>, who disproportionately suffer from physical and mental health concerns<sup>5 6</sup>.

Dissemination and implementation of EBPTs (e.g., cognitive behavioral therapy) to communities in need requires a multidimensional approach with innovative delivery methods.<sup>7</sup> “Task-shifting” or “task-sharing” is one notable strategy that has emerged over the past two decades, largely in low-and middle-income countries, as a method for delivering health care in lower-resource communities. As described by the World Health Organization, with task-shifting, “specific tasks are moved, where appropriate, from highly qualified health workers to health workers with shorter training and fewer qualifications in order to make more efficient use of the available human resources for health.”<sup>8</sup>

Task-shifting has great promise in improving access to EBPTs. A recent review of 27 trials in low-and middle-income countries found that task-shifted EBPTs delivered by lay persons in primary care and community settings produced a pooled effect size of 0.49.<sup>9</sup> Findings from this review indicate that EBPTs can be task-shifted and maintain effectiveness, while delivered in nontraditional settings that improve scalability. Therefore, task-shifting EBPTs to lay personnel or paraprofessionals such as community health workers could help reduce disparities in access to evidence-based mental healthcare, thus improving health equity<sup>8 10</sup>.

## Task-shifted psychological treatments

Many different EBPTs have been effectively task-shifted with cultural and contextual adaptations. For example, Patel and colleagues<sup>11</sup> developed a task-shifted treatment program for moderately-severe to severe depression based on Behavioral Activation<sup>12</sup>, an established EBPT. Their rigorous randomized controlled trial (RCT) in India showed that the Healthy Activity Program (HAP), delivered by non-specialist lay counselors in primary care, significantly improved patients' levels of depression (moderate effect size) and led to remission in almost two-thirds of patients treated.<sup>11</sup> Likewise, the "Friendship Bench" program by Chibanda and colleagues<sup>13</sup> was a task-shifting study conducted in Zimbabwe to address depression and common mental disorders. Their treatment program was based on Problem Solving Therapy<sup>14</sup>, an established EBPT<sup>15</sup>, and was delivered by lay health workers in a population with a high prevalence of people living with HIV. Results of their initial non-controlled clinical trial and a later RCT<sup>16</sup> showed that this approach was efficacious in reducing psychological morbidity; a large cluster RCT is now underway.<sup>17</sup> In both the HAP and the Friendship Bench studies, lay health workers were trained and supervised by licensed professional specialists (i.e., clinical psychologists and/or psychiatrists).

While task-shifting is a recognized method for disseminating EBPTs, the best-practice procedural steps for *how* to task-shift are unclear. A recognized problem in implementation research is that strategies are "often inconsistently labeled and poorly described ... lack operational definitions ... and are part of 'packaged' approaches whose specific elements are poorly understood" (p.254)<sup>18</sup>. It is critical to operationalize strategies used in task-shifting studies to better understand methods to (a) appropriately adapt the treatment for the new delivery context; (b) train lay personnel; (c) implement the new treatment protocol while maintaining



1  
2  
3 fidelity; and (d) sustain the task-shifted program. Efforts to scale up EBPTs are critical, yet there  
4  
5 is no straightforward roadmap for how to implement task-shifting in new settings. This gap in the  
6  
7 literature leaves interested stakeholders without clear guidance in deploying this promising  
8  
9 dissemination strategy. Therefore, our research question is: *What are the steps in adapting an  
10  
11 evidence-based psychological treatment for delivery by lay/non-licensed personnel?*

## 14 Objectives

16  
17 This protocol outlines our specific methods and planned analyses for a systematic  
18  
19 review. This paper adheres to the Preferred Reporting Items for Systematic review and Meta-  
20  
21 analysis Protocols (PRISMA-P).<sup>19</sup> The systematic review seeks to identify specific task-shifting  
22  
23 strategies using established definitions as described by Proctor and colleagues.<sup>18 20</sup> In Proctor's  
24  
25 framework for operationalizing implementation strategies, there are 7 dimensions to consider:  
26  
27 *The Actor, The Action, Action Target, Temporality, Dose, The Implementation Outcome Affected,*  
28  
29 *and The Justification.* We expect that most studies meeting our inclusion criteria for review will  
30  
31 have fairly uniform *justifications* and *action targets*; however, *implementation outcomes* are  
32  
33 likely to be wide-ranging and beyond the scope of this paper. Therefore, we will focus on  
34  
35 identifying the *actors, actions, temporality, and dose* employed in task-shifting studies (see  
36  
37 Table 1). The most important outcome of this review is to identify best practices for conducting  
38  
39 task-shifting implementation projects.  
40  
41  
42  
43

| <b><i>Dimension</i></b> | <b><i>Operational definition for the planned review</i></b>                                                                                                                                                              |
|-------------------------|--------------------------------------------------------------------------------------------------------------------------------------------------------------------------------------------------------------------------|
| <b>Actors</b>           | Those persons delivering the implementation strategy                                                                                                                                                                     |
| <b>Actions</b>          | The methodology used to (a) adapt the treatment for the new delivery context, (b) train the lay personnel to protocol adherence, (c) implement the new treatment protocol with fidelity, and (d) sustain the new program |
| <b>Temporality</b>      | The order/sequence of the action strategies                                                                                                                                                                              |
| <b>Dose</b>             | The amount or intensity of the actions, and how much those doses differ from standard/non-shifted EBPTs                                                                                                                  |

44  
45  
46  
47  
48  
49  
50  
51  
52  
53  
54 Table 1. Different dimensions of task-shifting strategies to be identified in the systematic review.  
55  
56  
57  
58  
59  
60

## Methods and Analysis

### Eligibility criteria

#### *Types of studies*

*Study Inclusion Criteria:* 1. Studies must involve a non-licensed, non-specialist (e.g., community health worker, promotor/a, peer, lay person) who is delivering the intervention; 2. Studies must address a “behavioral health” problem, broadly defined as any psychological/mental health issue (e.g., depression, eating disorders, parenting issues, substance use) and/or physical health concern (e.g., chronic disease management, health behavior change, lifestyle changes, adherence) using behavioral/psychological strategies. 3. The treatment components that have been shifted must be derived from an EBPT that has been found efficacious in at least 1 prior peer-reviewed RCT (e.g., cognitive behavioral therapy, motivational interviewing, behavioral activation, interpersonal psychotherapy). 4. The studies must include a statistical comparison of some kind. The comparator condition must be any of the following: baseline functioning of participants (as in pre-post design); or in an RCT, the control group must be attentional control, a waitlist control, a non-treated group, a treatment-as-usual group, a group receiving a different form of treatment, or a group receiving treatment delivered by an expert provider (e.g., licensed psychologist). Eligible study designs also include RCTs, quasi-experimental trials, pre-post designs, pragmatic trials (e.g., using stepped wedge or cluster RCT designs). 5. Eligible studies must report evidence of effectiveness of the task-shifting strategy by using a study design that statistically analyzes outcomes using a comparator/control.

*Study Exclusion Criteria:* 1. Studies that deliver care using a licensed or specialist/non-lay person (e.g., nurse, educator); 2. Studies focused solely on task-shifting a primarily medical task (e.g., HIV treatment, prenatal care); 3. Studies reporting psychological/behavioral

1  
2  
3 treatments that have not been previously proven effective as outlined above, or not involving  
4 treatment (e.g., screening only); 4. Patient education studies with no behavioral intervention  
5 (e.g., nutritional information only); 5. Studies not involving a comparison; 6. Descriptive studies,  
6 case reports, or exclusively qualitative studies; 7. Studies not published in a peer-reviewed  
7 journal (e.g., dissertations, poster or paper presentations, newsletter articles); 8. Books and book  
8 chapters; 9. Study protocol publications.  
9  
10  
11  
12  
13  
14  
15

### 16 *Types of participants*

17  
18  
19 *Participant Inclusion Criteria:* 1. Study participants must have received a  
20 psychological/behavioral-based (i.e., non-pharmacological) intervention for a “behavioral  
21 health” problem, broadly defined as any psychological/mental health problem (e.g., depression,  
22 eating disorder, parent-child behavioral issues, substance use) and/or physical health concern  
23 (e.g., chronic disease management, lifestyle changes, adherence); 2. Study participants must have  
24 received interventions delivered by non-licensed, non-specialists.  
25  
26  
27  
28  
29  
30  
31  
32

33 *Participant Exclusion Criteria:* 1. Patients treated using pharmacological, surgical, or  
34 medical procedures as the primary intervention tested in the study; 2. Participants treated  
35 exclusively by licensed health professionals (e.g., physicians, nurses); 3. Students receiving  
36 interventions delivered by teachers in schools.  
37  
38  
39  
40  
41

### 42 *Setting and timeframe*

43  
44  
45 *Inclusion Criteria for Setting and Timeframe:* 1. Task-shifting research studies conducted  
46 in high-, low- and middle-income countries. 2. Studies conducted in any setting (e.g., healthcare  
47 or community settings) or region (e.g., urban, rural).  
48  
49  
50

51  
52 *Exclusion Criteria for Setting and Timeframe:* Studies conducted prior to 2000 (i.e., the  
53 approximate time when task-shifting was first reported).  
54  
55  
56  
57  
58  
59  
60

## Report characteristics

### *Information sources*

The search strategy will be adapted for each of the following sources/databases: PubMed, the Cochrane Library, Cochrane Central Register of Controlled Trials (CENTRAL), SCOPUS, Cumulative Index to Nursing and Allied Health Literature (CINAHL), APA PsycInfo, and Google Scholar. The search will cover the time frame from January 2000 to July 2020. Peer-reviewed published literature will be sought and posters, dissertations, presentations; descriptive or protocol articles; books and book chapters; studies not published in English will be excluded. Unpublished studies will not be sought. The search will be re-run prior to the final analysis and any further studies identified will be retrieved for inclusion.

### *Search strategy*

The search strategy will be developed and overseen by a medical librarian in consultation with the primary researchers throughout the review. Medical Subject Headings and free-text terms relating to lay health workers and the implementation of task-shifting/sharing will be included (see Table 2).

| <b>Key Words</b>     | <b>Search Terms</b>                                                                                                                                                                                                                                                                                                                                                                                                                                                                                                                          |
|----------------------|----------------------------------------------------------------------------------------------------------------------------------------------------------------------------------------------------------------------------------------------------------------------------------------------------------------------------------------------------------------------------------------------------------------------------------------------------------------------------------------------------------------------------------------------|
| <b>Task-Shifting</b> | task-shifting; task-sharing; “care sharing”                                                                                                                                                                                                                                                                                                                                                                                                                                                                                                  |
| <b>Lay workers</b>   | Community health worker; church; community based facilitator; community based organization; health manpower; integrated care; lay counsellor; lay counselor; lay health worker; non-licensed; nonprofessional; non-specialist; nonspecialists; patient care teams; patient navigator; peer; peer-coach; peer-counsellor; peer-counselor; peer-facilitator; promotor; promotora; promotoras; promotores; self care; self management; shared care; staff development; telehealth; telemedicine; telepsychiatry; traditional healer; unlicensed |
| <b>EBPTs</b>         | psychological; psychological treatment; psychological intervention; empirically-supported psychological treatment; evidence-based psychological treatment; evidence-based behavioral treatment; evidence-based behavioural treatment; mental health; cognitive behavioral therapy;                                                                                                                                                                                                                                                           |

|  |                                                                                                                                                                                                   |
|--|---------------------------------------------------------------------------------------------------------------------------------------------------------------------------------------------------|
|  | cognitive behavioural therapy; behavioral therapy; behavioural therapy; interpersonal therapy; acceptance and commitment therapy; psychotherapy; motivational interviewing; interpersonal therapy |
|--|---------------------------------------------------------------------------------------------------------------------------------------------------------------------------------------------------|

Table 2. Key word search terms.

### *Study screening and selection*

Using a coding guide and form, two reviewers will independently search titles and abstracts to remove publications not meeting inclusion criteria. Full texts will be retrieved. Multiple reports of the same study will be linked together (collated) per Cochrane guidelines (see Handbook sec 4.6.2)<sup>21</sup> so that the unit of interest is each study, not each article. For example, if a single study was split into separate publications such as a protocol paper, report of the actual study, a qualitative analysis on acceptability, and a follow-up, it will be counted as one study, and each of these articles will be searched for relevant data. We will examine prior reviews on the same topic and employ hand-searching of the reference lists for articles identified in the inclusion stage. We will iteratively refine our search strategy to refine the coding guide and form. We will add indexing terms as needed during the preliminary development of the inclusion article guide.

### *Data extraction*

A data extraction chart has been developed by the team to aid in extracting the specific task-shifting steps from the included articles (see Table 3 for example of primary extractions). Data extracted will follow established definitions as described by Proctor and colleagues.<sup>18 20</sup> Additional data we anticipate extracting include year of study publication; design; setting; participant demographics; geographic location of study; type of personnel delivering the intervention; demographics of personnel delivering intervention; and reported effect sizes.

| Study | Actors                   | Actions                                                                                                                                                                                         |                                                         |                                                                                                                   |                                                                        | Temporality                                                                                                                                                                                  | Dose                                                                                                         |
|-------|--------------------------|-------------------------------------------------------------------------------------------------------------------------------------------------------------------------------------------------|---------------------------------------------------------|-------------------------------------------------------------------------------------------------------------------|------------------------------------------------------------------------|----------------------------------------------------------------------------------------------------------------------------------------------------------------------------------------------|--------------------------------------------------------------------------------------------------------------|
|       |                          | Adaptations                                                                                                                                                                                     | Training                                                | Implementation steps                                                                                              | Sustainment                                                            |                                                                                                                                                                                              |                                                                                                              |
| A     | Community health workers | Focus groups of CHWs and patients to help adapt standard CBT; modified language, developed weekly handouts, created CHW manual                                                                  | 2 half-day workshops delivered by licensed psychologist | Competency benchmarks were established; 20% of recordings listened to by licensed psychologist as fidelity checks | Weekly group supervision via phone with individual meetings as needed  | 1. Baseline evaluation of TAU program<br>2. Modifications to protocol based on focus groups<br>3. Training developed & delivered<br>4. Delivery of new program<br>5. Program evaluation      | Modified protocol from 6-week hour-long CBT sessions in clinic to 6 modules of CBT basics delivered in homes |
| B     | Peer facilitators        | Needs assessments, focus groups with existing peer supporters; changed format from weekly individual visits to group-based meetings; developed workbook for use by peer supporters and patients | 8-hour workshop delivered by licensed social worker     | Observed by licensed social worker until competent in manualized                                                  | Weekly group case conferences with social worker over virtual platform | 1. Modifications to existing EBPT protocol<br>2. Training<br>3. Observations till competence reached<br>4. Two groups of patients randomized to care<br>4. Case conferences throughout study | Modified a 12-week individual protocol based on MI to a 12-week group-based protocol                         |

Table 3. Example extraction summary table.

Two co-authors will independently conduct data extraction and an additional author will review the data extracted for completion and accuracy. When necessary, consensus will be reached through discussions with an independent fourth author. Missing data will be sought out by contacting study investigators for unreported data and/or additional details. Data will be recorded in an Excel spreadsheet.

#### *Assessing risk of bias*

Reviewers will consider risk of bias by assessing scientific rigor used in the study design (e.g., methods of randomization; treatment allocation; control comparator). Two reviewers will independently rate risk of bias and when necessary, disagreements will be resolved by reaching consensus with a third reviewer. Risk of publication bias will be mitigated by searching as extensively as possible using diverse databases, reviewing reference lists and any related systematic reviews.

#### *Data synthesis and analysis*

1  
2  
3 Data synthesis will primarily involve descriptive statistics with tables and graphs to  
4  
5 visually communicate findings. Descriptive statistics will be employed to categorize and tally the  
6  
7 different types of methodologies used in task-shifting studies, based on standardized language  
8  
9 for operationalizing implementation strategies<sup>18</sup>, to include *actors, actions, temporality* and *dose*.  
10  
11 Frequency counts and measures of central tendency will be included. We will report effect sizes  
12  
13 for each study. Although we are not grading evidence (i.e., incorporating all GRADE criteria<sup>22</sup>),  
14  
15 we have developed strict inclusion criteria for rigor and quality as outlined above.  
16  
17  
18

19 We will consider different subgroups of studies in our review, such as design, population,  
20  
21 personnel delivering intervention, location of studies, and setting. Although this review is  
22  
23 descriptive (no inferential statistical analyses are planned), different tables for each subgroup  
24  
25 will be developed. Various subgroups are important to consider separately because differences  
26  
27 are anticipated in methodologies depending on each subgroup, for example: design (randomized  
28  
29 vs. non-randomized trial), population (those with physical health vs. mental health concerns),  
30  
31 personnel delivering the intervention (community health worker vs. other lay personnel),  
32  
33 location of studies (low-and middle-income countries vs. high-income countries), and setting  
34  
35 (community vs. clinical or clinically-affiliated).  
36  
37  
38

#### 39 *Patient & Public Involvement*

40  
41  
42 Patients/public were not involved in choosing the methods or plans for dissemination of this  
43  
44 protocol. However, we will seek feedback on dissemination plans for the forthcoming systematic  
45  
46 review from our Community Health Worker Translational Advisory Board.  
47  
48

#### 49 **Ethics and dissemination**

50  
51 This review will analyze data from published studies only, thus it will not require  
52  
53 Institutional Board Review. Any important protocol amendments will be documented in the  
54  
55  
56  
57  
58  
59  
60

1  
2  
3 methods section of the planned systematic review manuscript. Findings will be presented at  
4  
5 conferences and published in a peer-reviewed journal.  
6

## 7 **Discussion**

8  
9  
10 We have developed a protocol for a systematic review focusing on task-shifting that will  
11  
12 identify steps in adapting an evidence-based psychological treatment for delivery by lay/non-  
13  
14 licensed personnel. Best practice guidelines will be developed and will have potential to provide  
15  
16 a useful roadmap using an important dissemination strategy.  
17  
18  
19  
20  
21  
22  
23  
24  
25  
26  
27  
28  
29  
30  
31  
32  
33  
34  
35  
36  
37  
38  
39  
40  
41  
42  
43  
44  
45  
46  
47  
48  
49  
50  
51  
52  
53  
54  
55  
56  
57  
58  
59  
60



**Author Contributions:**

KEK: literature search, study design, writing, critical revision, referencing; LSK: study design, writing, critical revision; JP: study design, writing, critical revision; LG: study design, writing; CG: search strategy; writing; ER: literature search, writing; EL: writing; critical revision; YJ-E: writing; critical revision; JEA: writing; critical revision; AR: study design; critical revision; JT: study design; critical revision; EF: study design, literature review, writing, critical revision.

**Funding statement:** This work was supported by the National Institute of Diabetes and Digestive and Kidney Diseases of the National Institutes of Health under Award Number K23DK123398 (PI: Kanzler) and by National Institute on Aging of the National Institutes of Health grant number K76AG060003-01A1 (PI: Kilpela). The content is solely the responsibility of the authors and does not necessarily represent the official views of the National Institutes of Health.

**Competing interests statement.** The authors have no competing interests to disclose.

## References

1. Kessler RC, Aguilar-Gaxiola S, Alonso J, et al. The global burden of mental disorders: an update from the WHO World Mental Health (WMH) surveys. *Epidemiology and Psychiatric Sciences* 2009;18(1):23-33.
2. Wang PS, Aguilar-Gaxiola S, Alonso J, et al. Use of mental health services for anxiety, mood, and substance disorders in 17 countries in the WHO world mental health surveys. *The Lancet* 2007;370(9590):841-50.
3. Kazdin AE, Blase SL. Rebooting psychotherapy research and practice to reduce the burden of mental illness. *Perspectives on psychological science* 2011;6(1):21-37.
4. Ogbeide S, Landoll R, Nielsen M, et al. To go or not go: Patient preference in seeking specialty mental health versus behavioral consultation within the primary care behavioral health consultation model. *Families, systems & health: the journal of collaborative family healthcare* 2018
5. Braveman PA, Cubbin C, Egerter S, et al. Socioeconomic disparities in health in the United States: what the patterns tell us. *American journal of public health* 2010;100(S1):S186-S96.
6. Pollack CE, Cubbin C, Sania A, et al. Do wealth disparities contribute to health disparities within racial/ethnic groups? *J Epidemiol Community Health* 2013;67(5):439-45.
7. Kazdin AE, Rabbitt SM. Novel models for delivering mental health services and reducing the burdens of mental illness. *Clinical Psychological Science* 2013;1(2):170-91.
8. World Health Organization. Task shifting: rational redistribution of tasks among health workforce teams: global recommendations and guidelines. 2007
9. Singla DR, Kohrt B, Murray LK, et al. Psychological treatments for the world: lessons from low-and middle-income countries. *Annual Review of Clinical Psychology* 2017;13(1)
10. Kazdin AE. Innovations in Psychosocial Interventions and Their Delivery: Leveraging Cutting-Edge Science to Improve the World's Mental Health: Oxford University Press 2018.
11. Patel V, Weobong B, Weiss HA, et al. The Healthy Activity Program (HAP), a lay counsellor-delivered brief psychological treatment for severe depression, in primary care in India: a randomised controlled trial. *The Lancet* 2017;389(10065):176-85.
12. Dimidjian S, Hollon SD, Dobson KS, et al. Randomized trial of behavioral activation, cognitive therapy, and antidepressant medication in the acute treatment of adults with major depression. *Journal of consulting and clinical psychology* 2006;74(4):658.
13. Chibanda D, Mesu P, Kajawu L, et al. Problem-solving therapy for depression and common mental disorders in Zimbabwe: piloting a task-shifting primary mental health care intervention in a population with a high prevalence of people living with HIV. *BMC public health* 2011;11(1):828.
14. Nezu AM, Nezu CM, Perri MG. Problem-solving therapy for depression: Theory, research, and clinical guidelines: John Wiley & Sons 1989.
15. Bell AC, D'Zurilla TJ. Problem-solving therapy for depression: a meta-analysis. *Clinical psychology review* 2009;29(4):348-53.
16. Chibanda D, Weiss HA, Verhey R, et al. Effect of a primary care-based psychological intervention on symptoms of common mental disorders in Zimbabwe: a randomized clinical trial. *Jama* 2016;316(24):2618-26.

17. Chibanda D, Bowers T, Verhey R, et al. The Friendship Bench programme: a cluster randomised controlled trial of a brief psychological intervention for common mental disorders delivered by lay health workers in Zimbabwe. *International journal of mental health systems* 2015;9(1):21.
18. Proctor EK, Powell BJ, McMillen JC. Implementation strategies: recommendations for specifying and reporting. *Implementation Science* 2013;8(1):139.
19. Moher D, Shamseer L, Clarke M, et al. Preferred reporting items for systematic review and meta-analysis protocols (PRISMA-P) 2015 statement. *Systematic reviews* 2015;4(1):1.
20. Kirchner JE, Waltz TJ, Powell BJ, et al. Implementation strategies. *Dissemination and implementation research in health: translating science to practice* 2017;2:245-66.
21. Cochrane. Cochrane Handbook for Systematic Reviews of Interventions version 6.0 (updated July 2019). In: JPT H, J T, J C, et al., eds., 2019.
22. Grading of Recommendations, Assessment, Development and Evaluation (GRADE) Working Group. Handbook for grading the quality of evidence and the strength of recommendations using the GRADE approach. In: Schünemann H, Brożek J, Guyatt G, et al., eds., 2013.

# Reporting checklist for protocol of a systematic review.

Based on the PRISMA-P guidelines.

## Instructions to authors

Complete this checklist by entering the page numbers from your manuscript where readers will find each of the items listed below.

Your article may not currently address all the items on the checklist. Please modify your text to include the missing information. If you are certain that an item does not apply, please write "n/a" and provide a short explanation.

Upload your completed checklist as an extra file when you submit to a journal.

In your methods section, say that you used the PRISMA-Reporting guidelines, and cite them as:

Moher D, Shamseer L, Clarke M, Ghersi D, Liberati A, Petticrew M, Shekelle P, Stewart LA. Preferred Reporting Items for Systematic Review and Meta-Analysis Protocols (PRISMA-P) 2015 statement. *Syst Rev.* 2015;4(1):1.

| Reporting Item      |                                                                                                                                                               | Page Number |
|---------------------|---------------------------------------------------------------------------------------------------------------------------------------------------------------|-------------|
| <b>Title</b>        |                                                                                                                                                               |             |
| Identification      | <a href="#">#1a</a> Identify the report as a protocol of a systematic review                                                                                  | 1           |
| Update              | <a href="#">#1b</a> If the protocol is for an update of a previous systematic review, identify as such                                                        | N/A         |
| <b>Registration</b> |                                                                                                                                                               |             |
|                     | <a href="#">#2</a> If registered, provide the name of the registry (such as PROSPERO) and registration number                                                 | N/A         |
| <b>Authors</b>      |                                                                                                                                                               |             |
| Contact             | <a href="#">#3a</a> Provide name, institutional affiliation, e-mail address of all protocol authors; provide physical mailing address of corresponding author | 1-2         |
| Contribution        | <a href="#">#3b</a> Describe contributions of protocol authors and identify the guarantor of the review                                                       | 14          |

## Amendments

|    |                      |                      |                                                                           |       |
|----|----------------------|----------------------|---------------------------------------------------------------------------|-------|
| 1  |                      | <a href="#">#4</a>   | If the protocol represents an amendment of a previously completed         | 13    |
| 2  |                      |                      | or published protocol, identify as such and list changes; otherwise,      |       |
| 3  |                      |                      | state plan for documenting important protocol amendments                  |       |
| 4  |                      |                      |                                                                           |       |
| 5  |                      |                      |                                                                           |       |
| 6  | <b>Support</b>       |                      |                                                                           |       |
| 7  |                      |                      |                                                                           |       |
| 8  | Sources              | <a href="#">#5a</a>  | Indicate sources of financial or other support for the review             | 14    |
| 9  |                      |                      |                                                                           |       |
| 10 | Sponsor              | <a href="#">#5b</a>  | Provide name for the review funder and / or sponsor                       | 14    |
| 11 |                      |                      |                                                                           |       |
| 12 | Role of sponsor or   | <a href="#">#5c</a>  | Describe roles of funder(s), sponsor(s), and / or institution(s), if any, | N/A   |
| 13 | funder               |                      | in developing the protocol                                                |       |
| 14 |                      |                      |                                                                           |       |
| 15 |                      |                      |                                                                           |       |
| 16 | <b>Introduction</b>  |                      |                                                                           |       |
| 17 |                      |                      |                                                                           |       |
| 18 | Rationale            | <a href="#">#6</a>   | Describe the rationale for the review in the context of what is           | 4-6   |
| 19 |                      |                      | already known                                                             |       |
| 20 | Objectives           | <a href="#">#7</a>   | Provide an explicit statement of the question(s) the review will          | 6     |
| 21 |                      |                      | address with reference to participants, interventions, comparators,       |       |
| 22 |                      |                      | and outcomes (PICO)                                                       |       |
| 23 |                      |                      |                                                                           |       |
| 24 |                      |                      |                                                                           |       |
| 25 |                      |                      |                                                                           |       |
| 26 |                      |                      |                                                                           |       |
| 27 |                      |                      |                                                                           |       |
| 28 | <b>Methods</b>       |                      |                                                                           |       |
| 29 |                      |                      |                                                                           |       |
| 30 | Eligibility criteria | <a href="#">#8</a>   | Specify the study characteristics (such as PICO, study design,            | 7-9   |
| 31 |                      |                      | setting, time frame) and report characteristics (such as years            |       |
| 32 |                      |                      | considered, language, publication status) to be used as criteria for      |       |
| 33 |                      |                      | eligibility for the review                                                |       |
| 34 |                      |                      |                                                                           |       |
| 35 |                      |                      |                                                                           |       |
| 36 |                      |                      |                                                                           |       |
| 37 | Information sources  | <a href="#">#9</a>   | Describe all intended information sources (such as electronic             | 9     |
| 38 |                      |                      | databases, contact with study authors, trial registers or other grey      |       |
| 39 |                      |                      | literature sources) with planned dates of coverage                        |       |
| 40 |                      |                      |                                                                           |       |
| 41 |                      |                      |                                                                           |       |
| 42 |                      |                      |                                                                           |       |
| 43 | Search strategy      | <a href="#">#10</a>  | Present draft of search strategy to be used for at least one electronic   | 9-10  |
| 44 |                      |                      | database, including planned limits, such that it could be repeated        |       |
| 45 |                      |                      |                                                                           |       |
| 46 |                      |                      |                                                                           |       |
| 47 | Study records - data | <a href="#">#11a</a> | Describe the mechanism(s) that will be used to manage records and         | 10-11 |
| 48 | management           |                      | data throughout the review                                                |       |
| 49 |                      |                      |                                                                           |       |
| 50 | Study records -      | <a href="#">#11b</a> | State the process that will be used for selecting studies (such as two    | 10-11 |
| 51 | selection process    |                      | independent reviewers) through each phase of the review (that is,         |       |
| 52 |                      |                      | screening, eligibility and inclusion in meta-analysis)                    |       |
| 53 |                      |                      |                                                                           |       |
| 54 |                      |                      |                                                                           |       |
| 55 |                      |                      |                                                                           |       |
| 56 |                      |                      |                                                                           |       |
| 57 |                      |                      |                                                                           |       |
| 58 |                      |                      |                                                                           |       |
| 59 |                      |                      |                                                                           |       |
| 60 |                      |                      |                                                                           |       |

|    |                      |                      |                                                                       |       |
|----|----------------------|----------------------|-----------------------------------------------------------------------|-------|
| 1  | Study records - data | <a href="#">#11c</a> | Describe planned method of extracting data from reports (such as      | 10-11 |
| 2  | collection process   |                      | piloting forms, done independently, in duplicate), any processes for  |       |
| 3  |                      |                      | obtaining and confirming data from investigators                      |       |
| 4  |                      |                      |                                                                       |       |
| 5  |                      |                      |                                                                       |       |
| 6  | Data items           | <a href="#">#12</a>  | List and define all variables for which data will be sought (such as  | 10-11 |
| 7  |                      |                      | PICO items, funding sources), any pre-planned data assumptions        |       |
| 8  |                      |                      | and simplifications                                                   |       |
| 9  |                      |                      |                                                                       |       |
| 10 |                      |                      |                                                                       |       |
| 11 | Outcomes and         | <a href="#">#13</a>  | List and define all outcomes for which data will be sought,           | 12    |
| 12 | prioritization       |                      | including prioritization of main and additional outcomes, with        |       |
| 13 |                      |                      | rationale                                                             |       |
| 14 |                      |                      |                                                                       |       |
| 15 |                      |                      |                                                                       |       |
| 16 |                      |                      |                                                                       |       |
| 17 | Risk of bias in      | <a href="#">#14</a>  | Describe anticipated methods for assessing risk of bias of individual | 11    |
| 18 | individual studies   |                      | studies, including whether this will be done at the outcome or study  |       |
| 19 |                      |                      | level, or both; state how this information will be used in data       |       |
| 20 |                      |                      | synthesis                                                             |       |
| 21 |                      |                      |                                                                       |       |
| 22 |                      |                      |                                                                       |       |
| 23 | Data synthesis       | <a href="#">#15a</a> | Describe criteria under which study data will be quantitatively       | 12    |
| 24 |                      |                      | synthesised                                                           |       |
| 25 |                      |                      |                                                                       |       |
| 26 |                      |                      |                                                                       |       |
| 27 | Data synthesis       | <a href="#">#15b</a> | If data are appropriate for quantitative synthesis, describe planned  | N/A   |
| 28 |                      |                      | summary measures, methods of handling data and methods of             |       |
| 29 |                      |                      | combining data from studies, including any planned exploration of     |       |
| 30 |                      |                      | consistency (such as I <sup>2</sup> , Kendall's $\tau$ )              |       |
| 31 |                      |                      |                                                                       |       |
| 32 |                      |                      |                                                                       |       |
| 33 |                      |                      |                                                                       |       |
| 34 | Data synthesis       | <a href="#">#15c</a> | Describe any proposed additional analyses (such as sensitivity or     | N/A   |
| 35 |                      |                      | subgroup analyses, meta-regression)                                   |       |
| 36 |                      |                      |                                                                       |       |
| 37 |                      |                      |                                                                       |       |
| 38 | Data synthesis       | <a href="#">#15d</a> | If quantitative synthesis is not appropriate, describe the type of    | 12    |
| 39 |                      |                      | summary planned                                                       |       |
| 40 |                      |                      |                                                                       |       |
| 41 |                      |                      |                                                                       |       |
| 42 | Meta-bias(es)        | <a href="#">#16</a>  | Specify any planned assessment of meta-bias(es) (such as              | 11    |
| 43 |                      |                      | publication bias across studies, selective reporting within studies)  |       |
| 44 |                      |                      |                                                                       |       |
| 45 |                      |                      |                                                                       |       |
| 46 | Confidence in        | <a href="#">#17</a>  | Describe how the strength of the body of evidence will be assessed    | 12    |
| 47 | cumulative           |                      | (such as GRADE)                                                       |       |
| 48 | evidence             |                      |                                                                       |       |
| 49 |                      |                      |                                                                       |       |
| 50 |                      |                      |                                                                       |       |

51 The PRISMA-P checklist is distributed under the terms of the Creative Commons Attribution License CC-BY  
 52 4.0. This checklist was completed on 19. August 2020 using <https://www.goodreports.org/>, a tool made by the  
 53 [EQUATOR Network](#) in collaboration with [Penelope.ai](#)  
 54  
 55

# BMJ Open

## Methodology for task-shifting evidence-based psychological treatments to non-licensed/lay health workers: Protocol for a systematic review

|                                 |                                                                                                                                                                                                                                                                                                                                                                                                                                                                                                                                                                                                                                                                                                                                                                                                                                                                                                                                                                                                                                                                                                                                                                                                                                                                                                                                                                                                                                                                                 |
|---------------------------------|---------------------------------------------------------------------------------------------------------------------------------------------------------------------------------------------------------------------------------------------------------------------------------------------------------------------------------------------------------------------------------------------------------------------------------------------------------------------------------------------------------------------------------------------------------------------------------------------------------------------------------------------------------------------------------------------------------------------------------------------------------------------------------------------------------------------------------------------------------------------------------------------------------------------------------------------------------------------------------------------------------------------------------------------------------------------------------------------------------------------------------------------------------------------------------------------------------------------------------------------------------------------------------------------------------------------------------------------------------------------------------------------------------------------------------------------------------------------------------|
| Journal:                        | <i>BMJ Open</i>                                                                                                                                                                                                                                                                                                                                                                                                                                                                                                                                                                                                                                                                                                                                                                                                                                                                                                                                                                                                                                                                                                                                                                                                                                                                                                                                                                                                                                                                 |
| Manuscript ID                   | bmjopen-2020-044012.R1                                                                                                                                                                                                                                                                                                                                                                                                                                                                                                                                                                                                                                                                                                                                                                                                                                                                                                                                                                                                                                                                                                                                                                                                                                                                                                                                                                                                                                                          |
| Article Type:                   | Protocol                                                                                                                                                                                                                                                                                                                                                                                                                                                                                                                                                                                                                                                                                                                                                                                                                                                                                                                                                                                                                                                                                                                                                                                                                                                                                                                                                                                                                                                                        |
| Date Submitted by the Author:   | 01-Dec-2020                                                                                                                                                                                                                                                                                                                                                                                                                                                                                                                                                                                                                                                                                                                                                                                                                                                                                                                                                                                                                                                                                                                                                                                                                                                                                                                                                                                                                                                                     |
| Complete List of Authors:       | <p>Kanzler, Kathryn; UT Health San Antonio, Research to Advance Community Health (ReACH) Center; UT Health San Antonio, Psychiatry &amp; Behavioral Sciences</p> <p>Kilpela, Lisa; UT Health San Antonio, Research to Advance Community Health (ReACH) Center; UT Health San Antonio, Psychiatry &amp; Behavioral Sciences</p> <p>Pugh, Jaqueline; UT Health San Antonio, Department of Medicine, Division of General and Hospital Medicine</p> <p>Garcini, Luz; UT Health San Antonio, Research to Advance Community Health (ReACH) Center</p> <p>Gaspard, Christine; UT Health San Antonio, Briscoe Library, Long School of Medicine</p> <p>Aikens, James; University of Michigan Medical School, Family Medicine</p> <p>Reynero, Erick; UT Health San Antonio, Research to Advance Community Health (ReACH) Center</p> <p>Tsevat, Joel; UT Health San Antonio, Research to Advance Community Health (ReACH) Center; The University of Texas at Austin Dell Medical School</p> <p>Lopez, Eliot; UT Health San Antonio, Psychiatry &amp; Behavioral Sciences</p> <p>Johnson-Esparza, Yajaira; UT Health San Antonio, Family &amp; Community Medicine</p> <p>Ramirez, Amelie G.; UT Health San Antonio, Population Health Sciences; UT Health San Antonio, Institute for Health Promotion Research</p> <p>Finley, Erin; UT Health San Antonio, Department of Medicine, Division of General and Hospital Medicine; South Texas Veterans Health Care System, Research Service</p> |
| <b>Primary Subject Heading</b>: | Mental health                                                                                                                                                                                                                                                                                                                                                                                                                                                                                                                                                                                                                                                                                                                                                                                                                                                                                                                                                                                                                                                                                                                                                                                                                                                                                                                                                                                                                                                                   |
| Secondary Subject Heading:      | Health services research, Public health, Global health, Evidence based practice                                                                                                                                                                                                                                                                                                                                                                                                                                                                                                                                                                                                                                                                                                                                                                                                                                                                                                                                                                                                                                                                                                                                                                                                                                                                                                                                                                                                 |
| Keywords:                       | MENTAL HEALTH, PUBLIC HEALTH, Organisation of health services < HEALTH SERVICES ADMINISTRATION & MANAGEMENT                                                                                                                                                                                                                                                                                                                                                                                                                                                                                                                                                                                                                                                                                                                                                                                                                                                                                                                                                                                                                                                                                                                                                                                                                                                                                                                                                                     |
|                                 |                                                                                                                                                                                                                                                                                                                                                                                                                                                                                                                                                                                                                                                                                                                                                                                                                                                                                                                                                                                                                                                                                                                                                                                                                                                                                                                                                                                                                                                                                 |

1  
2  
3  
4  
5  
6  
7  
8  
9  
10  
11  
12  
13  
14  
15  
16  
17  
18  
19  
20  
21  
22  
23  
24  
25  
26  
27  
28  
29  
30  
31  
32  
33  
34  
35  
36  
37  
38  
39  
40  
41  
42  
43  
44  
45  
46  
47  
48  
49  
50  
51  
52  
53  
54  
55  
56  
57  
58  
59  
60

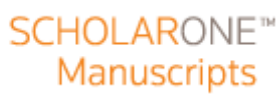





I, the Submitting Author has the right to grant and does grant on behalf of all authors of the Work (as defined in the below author licence), an exclusive licence and/or a non-exclusive licence for contributions from authors who are: i) UK Crown employees; ii) where BMJ has agreed a CC-BY licence shall apply, and/or iii) in accordance with the terms applicable for US Federal Government officers or employees acting as part of their official duties; on a worldwide, perpetual, irrevocable, royalty-free basis to BMJ Publishing Group Ltd ("BMJ") its licensees and where the relevant Journal is co-owned by BMJ to the co-owners of the Journal, to publish the Work in this journal and any other BMJ products and to exploit all rights, as set out in our [licence](#).

The Submitting Author accepts and understands that any supply made under these terms is made by BMJ to the Submitting Author unless you are acting as an employee on behalf of your employer or a postgraduate student of an affiliated institution which is paying any applicable article publishing charge ("APC") for Open Access articles. Where the Submitting Author wishes to make the Work available on an Open Access basis (and intends to pay the relevant APC), the terms of reuse of such Open Access shall be governed by a Creative Commons licence – details of these licences and which [Creative Commons](#) licence will apply to this Work are set out in our licence referred to above.

Other than as permitted in any relevant BMJ Author's Self Archiving Policies, I confirm this Work has not been accepted for publication elsewhere, is not being considered for publication elsewhere and does not duplicate material already published. I confirm all authors consent to publication of this Work and authorise the granting of this licence.

1  
2  
3  
4  
5  
6  
7  
8  
9  
10  
11  
12 Methodology for task-shifting evidence-based psychological treatments to non-licensed/lay  
13  
14 health workers: Protocol for a systematic review  
15  
16  
17  
18

19 Kathryn E. Kanzler <sup>1,2,3</sup>

20 Lisa Smith Kilpela <sup>1,2,4</sup>

21 Jaqueline Pugh <sup>5</sup>

22 Luz M. Garcini <sup>1,5</sup>

23 Christine Gaspard <sup>6</sup>

24 James E. Aikens <sup>7</sup>

25 Erick Reynero <sup>1</sup>

26 Joel Tsevat <sup>1,5</sup>

27 Eliot Lopez <sup>2,3</sup>

28 Yajaira Johnson-Esparza <sup>3</sup>

29 Amelie Ramirez <sup>8</sup>

30 Erin P. Finley <sup>1,5,2,9</sup>

- 31  
32  
33  
34  
35  
36  
37  
38  
39  
40  
41  
42  
43  
44  
45  
46  
47  
48  
49  
50 1. Research to Advance Community Health (ReACH) Center; University of Texas Health  
51 Science Center at San Antonio, San Antonio, TX, USA  
52 2. Department of Psychiatry & Behavioral Sciences; University of Texas Health Science  
53 Center at San Antonio, San Antonio, TX, USA  
54 3. Department of Family & Community Medicine; University of Texas Health Science  
55 Center at San Antonio, San Antonio, TX, USA  
56  
57  
58  
59  
60

4. Barshop Institute for Longevity and Aging Studies, University of Texas Health Science Center at San Antonio, San Antonio, TX, USA
5. Department of Medicine, University of Texas Health Science Center at San Antonio, San Antonio, TX, USA
6. Briscoe Library, Long School of Medicine, University of Texas Health Science Center at San Antonio, San Antonio, TX, USA
7. Department of Family Medicine, University of Michigan, Ann Arbor, MI, USA
8. Department of Population Health Sciences, University of Texas Health Science Center at San Antonio, San Antonio, TX, USA
9. South Texas Veterans Healthcare System, San Antonio, TX, USA

**Corresponding author:** Kathryn E. Kanzler, PsyD, ABPP, Research to Advance Community Health (ReACH) Center, University of Texas Health Science Center San Antonio, 7703 Floyd Curl Dr, Mail Code 7768, San Antonio, TX 78229, USA  
Email: [Kanzler@uthscsa.edu](mailto:Kanzler@uthscsa.edu)

Word count: 2054

## ABSTRACT

**Introduction:** “Task-shifting” or “task-sharing” is an effective strategy for delivering behavioral health care in lower-resource communities. However, little is known regarding the actual steps (methods) in carrying out a task-shifting project. This paper presents a protocol for a systematic review that will identify steps in adapting an evidence-based psychological treatment for delivery by lay/non-licensed personnel.

**Methods and analysis:** A systematic review of peer-reviewed, published studies involving a non-licensed, non-specialist (e.g., community health worker, promotor/a, peer, lay person) delivering an evidence-based psychological treatment for adults will be conducted. Study design of selected articles must include a statistical comparison (e.g., RCTs, quasi-experimental trials, pre-post designs, pragmatic trials). Study selection will follow the Preferred Reporting Items for Systematic Review and Meta-analysis (PRISMA) guidelines. PubMed, the Cochrane Library, Cochrane Central Register of Controlled Trials (CENTRAL), SCOPUS, Cumulative Index to Nursing and Allied Health Literature (CINAHL), APA PsycInfo, and Google Scholar databases will be searched from 2000-2020. A narrative synthesis will be conducted for all included studies and a summary table following Proctor’s framework for operationalizing implementation strategies will be included. This protocol was developed following the 2015 guidelines of PRISMA-Protocols.

**Ethics and dissemination:** This review will analyze data from published studies only, thus it will not require Institutional Board Review. Findings will be presented at conferences, to the broader community via Community Health Worker Translational Advisory Board and social media, and the final systematic review will be published in a peer-reviewed journal.

**Key Words:** Task-shifting; evidence-based psychological treatment; lay health worker; treatment delivery

### Article Summary

#### Strengths & limitations:

- This protocol describes a planned systematic review to identify best-practices for task-shifting evidence-based psychological treatments to non-licensed/lay health workers
- We will use established operationalized terms to identify and describe implementation strategies
- Studies will be identified via a thorough search strategy using independent data extraction techniques, with risk of bias mitigation strategies
- This protocol adheres to the 17-item checklist, Preferred Reporting Items for Systematic review and Meta-analysis Protocols (PRISMA-P)
- The review will only include studies in English and focuses on non-licensed/lay health workers (e.g., not nurses or teachers), and identifies only studies examining delivery of psychological treatments (i.e., not education or other programming).

## INTRODUCTION

Mental health disorders are common worldwide<sup>1</sup> and although there are evidence-based psychological treatments (EBPTs) that improve health outcomes, most of the people who need treatment do not receive it.<sup>2</sup> Mental health treatment is often provided by licensed mental health professionals in specialty settings<sup>3</sup>. These specialty providers may not be available due to workforce shortages, cost of care, and/or access difficulty, especially for lower-income and economically challenged populations<sup>4</sup>, who disproportionately suffer from physical and mental health concerns<sup>5 6</sup>.

Dissemination and implementation of EBPTs (e.g., cognitive behavioral therapy) to communities in need requires a multidimensional approach with innovative delivery methods.<sup>7</sup> “Task-shifting” or “task-sharing” is one notable strategy that has emerged over the past two decades, largely in low-and middle-income countries, as a method for delivering health care in lower-resource communities. As described by the World Health Organization, with task-shifting, “specific tasks are moved, where appropriate, from highly qualified health workers to health workers with shorter training and fewer qualifications in order to make more efficient use of the available human resources for health.”<sup>8</sup>

Task-shifting has great promise in improving access to EBPTs. A recent review of 27 trials in low-and middle-income countries found that task-shifted EBPTs delivered by lay persons in primary care and community settings produced a pooled effect size of 0.49.<sup>9</sup> Findings from this review indicate that EBPTs can be task-shifted and maintain effectiveness, while delivered in nontraditional settings that improve scalability. Lay health workers, such as community health workers or promotor/as, are often trusted members of their communities and perform many important roles, such as delivering physical health care,<sup>10 11</sup> mental health care,<sup>12-</sup>

1  
2  
3<sup>14</sup> and providing pandemic-related support.<sup>15 16</sup> Lay health workers help increase access to  
4 healthcare in lower-resource areas around the world. Therefore, task-shifting EBPTs to lay  
5 personnel or paraprofessionals can help reduce disparities in access to evidence-based mental  
6 healthcare, thus improving health equity<sup>8 17</sup>.

### 12 **Task-shifted psychological treatments**

14  
15 Many different EBPTs have been effectively task-shifted with cultural and contextual  
16 adaptations. For example, Patel and colleagues<sup>18</sup> developed a task-shifted treatment program for  
17 moderately-severe to severe depression based on Behavioral Activation<sup>19</sup>, an established EBPT.  
18 Their rigorous randomized controlled trial (RCT) in India showed that the Healthy Activity  
19 Program (HAP), delivered by non-specialist lay counselors in primary care, significantly  
20 improved patients' levels of depression (moderate effect size) and led to remission in almost  
21 two-thirds of patients treated.<sup>18</sup> Likewise, the "Friendship Bench" program by Chibanda and  
22 colleagues<sup>20</sup> was a task-shifting study conducted in Zimbabwe to address depression and  
23 common mental disorders. Their treatment program was based on Problem Solving Therapy<sup>21</sup>, an  
24 established EBPT<sup>22</sup>, and was delivered by lay health workers in a population with a high  
25 prevalence of people living with HIV. Results of their initial non-controlled clinical trial and a  
26 later RCT<sup>23</sup> showed that this approach was efficacious in reducing psychological morbidity; a  
27 large cluster RCT is now underway.<sup>24</sup> In both the HAP and the Friendship Bench studies, lay  
28 health workers were trained and supervised by licensed professional specialists (i.e., clinical  
29 psychologists and/or psychiatrists).

30  
31  
32  
33  
34  
35  
36  
37  
38  
39  
40  
41  
42  
43  
44  
45  
46  
47  
48  
49 While task-shifting is a recognized method for disseminating EBPTs, the best-practice  
50 procedural steps for *how* to task-shift are unclear. A recognized problem in implementation  
51 research is that strategies are "often inconsistently labeled and poorly described ... lack  
52  
53  
54  
55  
56  
57  
58  
59  
60

operational definitions ... and are part of ‘packaged’ approaches whose specific elements are poorly understood” (p.254)<sup>25</sup>. Efforts to scale up EBPTs are critical, yet there is no straightforward roadmap for how to implement task-shifting in new settings. This gap in the literature leaves interested stakeholders without clear guidance in deploying this promising implementation strategy. Therefore, we seek to operationalize such strategies used in task-shifting projects. Our research question is: *What are the best practices in task-shifting an EBPT for delivery by lay/non-licensed personnel, including methods of (a) adapting the treatment for the new delivery context; (b) training lay personnel; (c) implementing the new treatment protocol and maintaining fidelity; and (d) sustaining the task-shifted program over time?*

## Objectives

This protocol outlines our specific methods and planned analyses for a systematic review. This paper adheres to the Preferred Reporting Items for Systematic review and Meta-analysis Protocols (PRISMA-P).<sup>26</sup> The systematic review seeks to identify specific task-shifting strategies using established definitions as described by Proctor and colleagues.<sup>25 27</sup> In Proctor’s framework for operationalizing implementation strategies, there are 7 dimensions to consider: *The Actor, The Action, Action Target, Temporality, Dose, The Implementation Outcome Affected,* and *The Justification*. Our review will focus on identifying each of these strategies employed in task-shifting studies, operationally defined in Table 1. The most important outcome of this review is to identify best practices for conducting task-shifting implementation projects.

| <b><i>Dimension</i></b> | <b><i>Operational definition for the planned systematic review</i></b>                                                                                                                                                   |
|-------------------------|--------------------------------------------------------------------------------------------------------------------------------------------------------------------------------------------------------------------------|
| <b>Actors</b>           | Those persons delivering the implementation strategy                                                                                                                                                                     |
| <b>Actions</b>          | The methodology used to (a) adapt the treatment for the new delivery context, (b) train the lay personnel to protocol adherence, (c) implement the new treatment protocol with fidelity, and (d) sustain the new program |
| <b>Action target</b>    | The focus of the task-shifting strategy, including the type of personnel delivering the intervention and the recipients                                                                                                  |
| <b>Temporality</b>      | The order/sequence of the action strategies                                                                                                                                                                              |

|                                        |                                                                                                                                                                                                      |
|----------------------------------------|------------------------------------------------------------------------------------------------------------------------------------------------------------------------------------------------------|
| <b>Dose</b>                            | The amount or intensity of the actions, and how much those doses differ from standard/non-shifted EBPTs                                                                                              |
| <b>Implementation outcome affected</b> | Identification of which outcome—acceptability, adoption, appropriateness, feasibility, fidelity, implementation cost, penetration, and/or sustainability—is being targeted by the actions identified |
| <b>Justification</b>                   | Theoretical, empirical and/or pragmatic rationale for the strategies used to implement their intervention                                                                                            |

Table 1. Dimensions and definitions of task-shifting strategies for the proposed systematic review.

## Methods and Analysis

### Eligibility criteria

#### *Types of studies*

*Study Inclusion Criteria:* 1. Studies must involve a non-licensed, non-specialist (e.g., community health worker, promotor/a, peer, lay person) who is delivering the intervention; 2. Studies must address a “behavioral health” problem, broadly defined as any psychological/mental health issue (e.g., depression, eating disorders, substance use) and/or physical health concern (e.g., chronic disease management, health behavior change, lifestyle changes, adherence) using behavioral/psychological strategies. 3. The treatment components that have been shifted must be derived from an EBPT that has been found efficacious in at least 1 prior peer-reviewed RCT (e.g., cognitive behavioral therapy, motivational interviewing, behavioral activation, interpersonal psychotherapy). 4. The studies must include a statistical comparison of some kind. The comparator condition must be any of the following: baseline functioning of participants (as in pre-post design); or in an RCT, the control group must be attentional control, a waitlist control, a non-treated group, a treatment-as-usual group, a group receiving a different form of treatment, or a group receiving treatment delivered by an expert provider (e.g., licensed psychologist). Eligible study designs also include RCTs, quasi-experimental trials, pre-post designs, pragmatic trials (e.g., using stepped wedge or cluster RCT designs). 5. Eligible studies must report evidence of effectiveness of the task-shifting strategy



(i.e., clinical outcomes) by using a study design that statistically analyzes outcomes using a comparator/control.

*Study Exclusion Criteria:* 1. Studies that deliver care solely using a licensed or specialist/non-lay person (e.g., nurse, educator); 2. Studies focused solely on task-shifting a primarily medical task (e.g., HIV treatment, prenatal care); 3. Studies reporting psychological/behavioral treatments that have not been previously proven effective as outlined above, or not involving treatment (e.g., screening only); 4. Patient education studies with no behavioral intervention (e.g., nutritional information only); 5. Studies not involving a comparison; 6. Descriptive studies, case reports, or exclusively qualitative studies; 7. Studies not published in a peer-reviewed journal (e.g., dissertations, poster or paper presentations, newsletter articles); 8. Books and book chapters; 9. Study protocol publications.

#### *Types of participants*

*Participant Inclusion Criteria:* 1. Study participants must have received a psychological/behavioral-based (i.e., non-pharmacological) intervention for a “behavioral health” problem, broadly defined as any psychological/mental health problem (e.g., depression, eating disorder, parent-child behavioral issues, substance use) and/or physical health concern (e.g., chronic disease management, lifestyle changes, adherence); 2. Study participants must have received interventions delivered by non-licensed, non-specialists; 3. Study participants must be adults age 18 years and older.

*Participant Exclusion Criteria:* 1. Patients treated using pharmacological, surgical, or medical procedures as the primary intervention tested in the study; 2. Participants treated exclusively by licensed health professionals (e.g., physicians, nurses).

#### *Setting and timeframe*

*Inclusion Criteria for Setting and Timeframe:* 1. Task-shifting research studies conducted in high-, low- and middle-income countries; 2. Studies conducted in any setting (e.g., healthcare or community settings) or region (e.g., urban, rural).

*Exclusion Criteria for Setting and Timeframe:* Studies conducted prior to 2000 (i.e., the approximate time when task-shifting was first reported).

#### Report characteristics

#### *Information sources*

The search strategy will be adapted for each of the following sources/databases: PubMed, the Cochrane Library, Cochrane Central Register of Controlled Trials (CENTRAL), SCOPUS, Cumulative Index to Nursing and Allied Health Literature (CINAHL), APA PsycInfo, and Google Scholar. The search will cover the time frame from January 2000 to July 2020. Peer-reviewed published literature will be sought and posters, dissertations, presentations; descriptive or protocol articles; books and book chapters; studies not published in English will be excluded. Unpublished studies will not be sought. The search will be re-run prior to the final analysis and any further studies identified will be retrieved for inclusion.

#### *Search strategy*

The search strategy will be developed and overseen by a medical librarian in consultation with the primary researchers throughout the review (see supplementary files for PubMed search strategy example). Medical Subject Headings and free-text terms relating to lay health workers and the implementation of task-shifting/sharing will be included (see Table 2).

| <b><i>Key Words</i></b> | <b><i>Search Terms</i></b>                  |
|-------------------------|---------------------------------------------|
| <b>Task-Shifting</b>    | task-shifting; task-sharing; “care sharing” |

|                    |                                                                                                                                                                                                                                                                                                                                                                                                                                                                                      |
|--------------------|--------------------------------------------------------------------------------------------------------------------------------------------------------------------------------------------------------------------------------------------------------------------------------------------------------------------------------------------------------------------------------------------------------------------------------------------------------------------------------------|
| <b>Lay workers</b> | community health worker; church; community based facilitator; community based organization; health manpower; lay counsellor; lay counselor; lay health worker; non-licensed; nonprofessional; non-specialist; nonspecialists; patient care teams; patient navigator; peer; peer-coach; peer-counsellor; peer-counselor; peer-facilitator; promotor; promotora; promotoras; promotores; self care; self management; shared care; ; traditional healer; unlicensed                     |
| <b>EBPTs</b>       | psychological; psychological treatment; psychological intervention; empirically-supported psychological treatment; evidence-based psychological treatment; evidence-based behavioral treatment; evidence-based behavioural treatment; mental health; cognitive behavioral therapy; cognitive behavioural therapy; behavioral therapy; behavioural therapy; interpersonal therapy; acceptance and commitment therapy; psychotherapy; motivational interviewing; interpersonal therapy |

Table 2. Key word search terms.

### *Study screening and selection*

Using a coding guide and form, two reviewers will independently search titles and abstracts to remove publications not meeting inclusion criteria. Full texts will be retrieved. Multiple reports of the same study will be linked together (collated) per Cochrane guidelines (see Handbook sec 4.6.2)<sup>28</sup> so that the unit of interest is each study, not each article. For example, if a single study was split into separate publications such as a protocol paper, report of the actual study, a qualitative analysis on acceptability, and a follow-up, it will be counted as one study, and each of these articles will be searched for relevant data. We will examine prior reviews on the same topic and employ hand-searching of the reference lists for articles identified in the inclusion stage. We will iteratively refine our search strategy to refine the coding guide and form. We will add indexing terms as needed during the preliminary development of the inclusion article guide.

### *Data extraction*

A data extraction chart has been developed by the team to aid in extracting the specific task-shifting steps from the included articles (see supplementary files for example of study

1  
2  
3 extraction table). Data extracted will follow established definitions as described by Proctor and  
4  
5 colleagues.<sup>25 27</sup> Additional data we anticipate extracting include year of study publication;  
6  
7 design; setting; participant demographics; geographic location of study; type of personnel  
8  
9 delivering the intervention; demographics of personnel delivering intervention; and reported  
10  
11 effect sizes.  
12  
13

14  
15 Two co-authors will independently conduct data extraction and an additional author will  
16  
17 review the data extracted for completion and accuracy. When necessary, consensus will be  
18  
19 reached through discussions with an independent fourth author. Missing data will be sought out  
20  
21 by contacting study investigators for unreported data and/or additional details. Data will be  
22  
23 recorded in an Excel spreadsheet.  
24  
25

#### 26 *Assessing risk of bias*

27

28  
29 Reviewers will consider risk of bias by assessing scientific rigor used in the study design  
30  
31 (e.g., methods of randomization; treatment allocation; control comparator). Two reviewers will  
32  
33 independently rate risk of bias and when necessary, disagreements will be resolved by reaching  
34  
35 consensus with a third reviewer. Risk of publication bias will be mitigated by searching as  
36  
37 extensively as possible using diverse databases, reviewing reference lists and any related  
38  
39 systematic reviews.  
40  
41

#### 42 *Data synthesis and analysis*

43

44  
45 Data synthesis will primarily involve descriptive statistics with tables and graphs to  
46  
47 visually communicate findings. Descriptive statistics will be employed to categorize and tally the  
48  
49 different types of methodologies used in task-shifting studies, based on standardized language  
50  
51 for operationalizing implementation strategies<sup>25</sup>, to include *actors, actions, action targets,*  
52  
53 *implementation outcome affected, temporality, dose and justification.* Frequency counts and  
54  
55  
56  
57  
58  
59  
60

1  
2  
3 measures of central tendency will be included. We will report effect sizes for each study.  
4  
5 Although we are not grading evidence (i.e., incorporating all GRADE criteria<sup>29</sup>), we have  
6  
7 developed strict inclusion criteria for rigor and quality as outlined above.  
8  
9

10 We will consider different subgroups of studies in our review, such as design, population,  
11  
12 personnel delivering intervention, location of studies, and setting. Although this review is  
13  
14 descriptive (no inferential statistical analyses are planned), different tables for each subgroup  
15  
16 will be developed. Various subgroups are important to consider separately because differences  
17  
18 are anticipated in methodologies depending on each subgroup, for example: design (randomized  
19  
20 vs. non-randomized trial), population (those with physical health vs. mental health concerns),  
21  
22 personnel delivering the intervention (community health worker vs. other lay personnel),  
23  
24 location of studies (low-and middle-income countries vs. high-income countries), and setting  
25  
26 (community vs. clinical or clinically-affiliated).  
27  
28  
29

### 30 *Patient & Public Involvement*

31  
32  
33 Patients/public were not involved in choosing the methods or plans for dissemination of this  
34  
35 protocol. However, we will seek feedback on dissemination plans for the forthcoming systematic  
36  
37 review from our Community Health Worker Translational Advisory Board.  
38  
39

### 40 **Ethics and dissemination**

41  
42 This review will analyze data from published studies only, thus it will not require  
43  
44 Institutional Board Review. Any important protocol amendments will be documented in the  
45  
46 methods section of the planned systematic review manuscript. Findings will be presented at  
47  
48 conferences and published in a peer-reviewed journal.  
49  
50  
51  
52  
53  
54  
55  
56  
57  
58  
59  
60

**Author Contributions:**

KEK: literature search, study design, writing, critical revision, referencing; LSK: study design, writing, critical revision; JP: study design, writing, critical revision; LG: study design, writing; CG: search strategy; writing; ER: literature search, writing; EL: writing; critical revision; YJ-E: writing; critical revision; JEA: writing; critical revision; AR: study design; critical revision; JT: study design; critical revision; EF: study design, literature review, writing, critical revision.

**Funding statement:** This work was supported by the National Institute of Diabetes and Digestive and Kidney Diseases of the National Institutes of Health under Award Number K23DK123398 (PI: Kanzler) and by National Institute on Aging of the National Institutes of Health grant number K76AG060003-01A1 (PI: Kilpela). The content is solely the responsibility of the authors and does not necessarily represent the official views of the National Institutes of Health.

**Competing interests statement.** The authors have no competing interests to disclose.

## References

1. Kessler RC, Aguilar-Gaxiola S, Alonso J, et al. The global burden of mental disorders: an update from the WHO World Mental Health (WMH) surveys. *Epidemiology and Psychiatric Sciences* 2009;18(1):23-33.
2. Wang PS, Aguilar-Gaxiola S, Alonso J, et al. Use of mental health services for anxiety, mood, and substance disorders in 17 countries in the WHO world mental health surveys. *The Lancet* 2007;370(9590):841-50.
3. Kazdin AE, Blase SL. Rebooting psychotherapy research and practice to reduce the burden of mental illness. *Perspectives on psychological science* 2011;6(1):21-37.
4. Ogbeide S, Landoll R, Nielsen M, et al. To go or not go: Patient preference in seeking specialty mental health versus behavioral consultation within the primary care behavioral health consultation model. *Families, systems & health: the journal of collaborative family healthcare* 2018
5. Braveman PA, Cubbin C, Egerter S, et al. Socioeconomic disparities in health in the United States: what the patterns tell us. *American journal of public health* 2010;100(S1):S186-S96.
6. Pollack CE, Cubbin C, Sania A, et al. Do wealth disparities contribute to health disparities within racial/ethnic groups? *J Epidemiol Community Health* 2013;67(5):439-45.
7. Kazdin AE, Rabbitt SM. Novel models for delivering mental health services and reducing the burdens of mental illness. *Clinical Psychological Science* 2013;1(2):170-91.
8. World Health Organization. Task shifting: rational redistribution of tasks among health workforce teams: global recommendations and guidelines. 2007
9. Singla DR, Kohrt B, Murray LK, et al. Psychological treatments for the world: lessons from low-and middle-income countries. *Annual Review of Clinical Psychology* 2017;13(1)
10. Norris SL, Chowdhury FM, Van Le K, et al. Effectiveness of community health workers in the care of persons with diabetes. *Diabetic Medicine* 2006;23(5):544-56.
11. Scott K, Beckham S, Gross M, et al. What do we know about community-based health worker programs? A systematic review of existing reviews on community health workers. *Human resources for health* 2018;16(1):39.
12. Barnett ML, Gonzalez A, Miranda J, et al. Mobilizing community health workers to address mental health disparities for underserved populations: a systematic review. *Administration and Policy in Mental Health and Mental Health Services Research* 2018;45(2):195-211.
13. Barnett ML, Lau AS, Miranda J. Lay health worker involvement in evidence-based treatment delivery: a conceptual model to address disparities in care. *Annual review of clinical psychology* 2018;14:185-208.
14. Hoelt TJ, Fortney JC, Patel V, et al. Task-sharing approaches to improve mental health care in rural and other low-resource settings: a systematic review. *The Journal of rural health* 2018;34(1):48-62.
15. Bhaumik S, Moola S, Tyagi J, et al. Community health workers for pandemic response: a rapid evidence synthesis. *BMJ Global Health* 2020;5(6):e002769.
16. Boyce MR, Katz R. Community health workers and pandemic preparedness: current and prospective roles. *Frontiers in public health* 2019;7:62.

17. Kazdin AE. Innovations in Psychosocial Interventions and Their Delivery: Leveraging Cutting-Edge Science to Improve the World's Mental Health: Oxford University Press 2018.
18. Patel V, Weobong B, Weiss HA, et al. The Healthy Activity Program (HAP), a lay counsellor-delivered brief psychological treatment for severe depression, in primary care in India: a randomised controlled trial. *The Lancet* 2017;389(10065):176-85.
19. Dimidjian S, Hollon SD, Dobson KS, et al. Randomized trial of behavioral activation, cognitive therapy, and antidepressant medication in the acute treatment of adults with major depression. *Journal of consulting and clinical psychology* 2006;74(4):658.
20. Chibanda D, Mesu P, Kajawu L, et al. Problem-solving therapy for depression and common mental disorders in Zimbabwe: piloting a task-shifting primary mental health care intervention in a population with a high prevalence of people living with HIV. *BMC public health* 2011;11(1):828.
21. Nezu AM, Nezu CM, Perri MG. Problem-solving therapy for depression: Theory, research, and clinical guidelines: John Wiley & Sons 1989.
22. Bell AC, D'Zurilla TJ. Problem-solving therapy for depression: a meta-analysis. *Clinical psychology review* 2009;29(4):348-53.
23. Chibanda D, Weiss HA, Verhey R, et al. Effect of a primary care-based psychological intervention on symptoms of common mental disorders in Zimbabwe: a randomized clinical trial. *Jama* 2016;316(24):2618-26.
24. Chibanda D, Bowers T, Verhey R, et al. The Friendship Bench programme: a cluster randomised controlled trial of a brief psychological intervention for common mental disorders delivered by lay health workers in Zimbabwe. *International journal of mental health systems* 2015;9(1):21.
25. Proctor EK, Powell BJ, McMillen JC. Implementation strategies: recommendations for specifying and reporting. *Implementation Science* 2013;8(1):139.
26. Moher D, Shamseer L, Clarke M, et al. Preferred reporting items for systematic review and meta-analysis protocols (PRISMA-P) 2015 statement. *Systematic reviews* 2015;4(1):1.
27. Kirchner JE, Waltz TJ, Powell BJ, et al. Implementation strategies. *Dissemination and implementation research in health: translating science to practice* 2017;2:245-66.
28. Cochrane. Cochrane Handbook for Systematic Reviews of Interventions version 6.0 (updated July 2019). In: JPT H, J T, J C, et al., eds., 2019.
29. Grading of Recommendations A, Development and Evaluation (GRADE) Working Group, . . Handbook for grading the quality of evidence and the strength of recommendations using the GRADE approach. In: Schünemann H, Brożek J, Guyatt G, et al., eds., 2013.



Supplemental Material: Example Study Extraction

|                                                     |                                                                                                                                                                                                                                                                                                                                                                                                                                         |                                                                                                                                                                                                                                                                                                                                                                                       |                                                                                             |                                                                |                                                          |                                                                                                                            |
|-----------------------------------------------------|-----------------------------------------------------------------------------------------------------------------------------------------------------------------------------------------------------------------------------------------------------------------------------------------------------------------------------------------------------------------------------------------------------------------------------------------|---------------------------------------------------------------------------------------------------------------------------------------------------------------------------------------------------------------------------------------------------------------------------------------------------------------------------------------------------------------------------------------|---------------------------------------------------------------------------------------------|----------------------------------------------------------------|----------------------------------------------------------|----------------------------------------------------------------------------------------------------------------------------|
| <p><b>Study 1</b><br/>Smith &amp; Garza (2020).</p> | <p><b>Design:</b> RCT<br/><b>Setting:</b> Primary care clinic/academic medical center<br/><b>Participant demographics:</b> Adults age 18-65, 60% women, 45% Hispanic/Latinx; 25% White non-Hispanic/Latinx, 6% Black, 4% other<br/><b>Geographic location:</b> Southwestern US<br/><b>Effect sizes:</b> Between group differences: <math>d=0.065</math> (medium), Within-group difference (Active tx): <math>d=0.06</math> (medium)</p> |                                                                                                                                                                                                                                                                                                                                                                                       |                                                                                             |                                                                |                                                          |                                                                                                                            |
| <p><b>ACTIONS, TEMPORALITY &amp; DOSE</b></p>       | <p><b>Adaptations</b></p>                                                                                                                                                                                                                                                                                                                                                                                                               | <p><b>Description:</b> Modified protocol from 6-week hour-long CBT for depression sessions in clinic to 6 modules of CBT basics delivered in homes by CHWs</p> <ol style="list-style-type: none"> <li>1. Three one-hour focus groups</li> <li>2. Modifications to CBT for depression protocol based on focus group feedback</li> <li>3. Revisions of handouts and protocol</li> </ol> | <p><i>Focus groups:</i> CHWs</p> <p><i>Modifications &amp; materials:</i> Research team</p> | <p>CBT for depression protocol and handouts</p>                | <p>-Acceptability<br/>-Adoption<br/>-Appropriateness</p> | <p><i>Focus groups:</i> Empirical &amp; pragmatic</p> <p><i>Modifications &amp; materials:</i> pragmatic justification</p> |
|                                                     | <p><b>Training</b></p>                                                                                                                                                                                                                                                                                                                                                                                                                  | <ol style="list-style-type: none"> <li>4. Training developed post-focus group</li> <li>5. Two half-day workshop trainings</li> <li>6. Pre-post knowledge tests</li> </ol>                                                                                                                                                                                                             | <p>Licensed Psychologists taught CHWs</p>                                                   | <p>Knowledge &amp; skills of CHWs</p>                          | <p>-Feasibility</p>                                      | <p>Pragmatic</p>                                                                                                           |
|                                                     | <p><b>Implementation steps</b></p>                                                                                                                                                                                                                                                                                                                                                                                                      | <ol style="list-style-type: none"> <li>7. Established competency benchmarks</li> <li>8. Implementation of program</li> <li>9. Random selection of recordings (20%) for fidelity to competency benchmarks</li> <li>10. Feedback with weekly supervision</li> </ol>                                                                                                                     | <p>Licensed psychologists listened to recordings/provided supervision to CHWs</p>           | <p>Primary care patients<br/>CHWs</p>                          | <p>-Fidelity<br/>-Uptake</p>                             | <p>Theoretical &amp; empirical</p>                                                                                         |
|                                                     | <p><b>Sustainment</b></p>                                                                                                                                                                                                                                                                                                                                                                                                               | <ol style="list-style-type: none"> <li>11. System hired supervising psychologist to provide weekly group supervision</li> <li>12. Funding to sustain provided by clinic department</li> </ol>                                                                                                                                                                                         | <p>Administrators supported infrastructure change</p>                                       | <p>Program - CBT for depression delivered in homes by CHWs</p> | <p>-Sustainability &amp; maintenance</p>                 | <p>Pragmatic</p>                                                                                                           |

| Search Strategy: PubMed                                                                                                                                                                                                                                                                                                                                                                                                                                                                                                                                                                                                                                                                                                                                                                                                                                                                                                                                                                                                                                                                                                                                                                                                                                                                                                                                                                                                                                                                                                                                                                                                                                                                                                                                                                                                                                                                                                                                                                                                                                                                                                                                                                                                                                                                                                                                                                                                                                                                                                                                                                                                                                                                                                                                                                                                                                                                                                                                                                                                                                                                                                                                                                                                                                                                                                                                                                                                                                                                                                                                                                                                                                                                                                                                                                                                                                                                                                                                                                                                                                                                                                                                                                                                                                                                                                                                                                                                                                                                                                                                                                                                                                                                                                                                                                          | Results | Key Words |
|--------------------------------------------------------------------------------------------------------------------------------------------------------------------------------------------------------------------------------------------------------------------------------------------------------------------------------------------------------------------------------------------------------------------------------------------------------------------------------------------------------------------------------------------------------------------------------------------------------------------------------------------------------------------------------------------------------------------------------------------------------------------------------------------------------------------------------------------------------------------------------------------------------------------------------------------------------------------------------------------------------------------------------------------------------------------------------------------------------------------------------------------------------------------------------------------------------------------------------------------------------------------------------------------------------------------------------------------------------------------------------------------------------------------------------------------------------------------------------------------------------------------------------------------------------------------------------------------------------------------------------------------------------------------------------------------------------------------------------------------------------------------------------------------------------------------------------------------------------------------------------------------------------------------------------------------------------------------------------------------------------------------------------------------------------------------------------------------------------------------------------------------------------------------------------------------------------------------------------------------------------------------------------------------------------------------------------------------------------------------------------------------------------------------------------------------------------------------------------------------------------------------------------------------------------------------------------------------------------------------------------------------------------------------------------------------------------------------------------------------------------------------------------------------------------------------------------------------------------------------------------------------------------------------------------------------------------------------------------------------------------------------------------------------------------------------------------------------------------------------------------------------------------------------------------------------------------------------------------------------------------------------------------------------------------------------------------------------------------------------------------------------------------------------------------------------------------------------------------------------------------------------------------------------------------------------------------------------------------------------------------------------------------------------------------------------------------------------------------------------------------------------------------------------------------------------------------------------------------------------------------------------------------------------------------------------------------------------------------------------------------------------------------------------------------------------------------------------------------------------------------------------------------------------------------------------------------------------------------------------------------------------------------------------------------------------------------------------------------------------------------------------------------------------------------------------------------------------------------------------------------------------------------------------------------------------------------------------------------------------------------------------------------------------------------------------------------------------------------------------------------------------------------------------------|---------|-----------|
| 10 #9 NOT (telemedicine OR telehealth OR telepsychiatry)                                                                                                                                                                                                                                                                                                                                                                                                                                                                                                                                                                                                                                                                                                                                                                                                                                                                                                                                                                                                                                                                                                                                                                                                                                                                                                                                                                                                                                                                                                                                                                                                                                                                                                                                                                                                                                                                                                                                                                                                                                                                                                                                                                                                                                                                                                                                                                                                                                                                                                                                                                                                                                                                                                                                                                                                                                                                                                                                                                                                                                                                                                                                                                                                                                                                                                                                                                                                                                                                                                                                                                                                                                                                                                                                                                                                                                                                                                                                                                                                                                                                                                                                                                                                                                                                                                                                                                                                                                                                                                                                                                                                                                                                                                                                         | 137     |           |
| 3 #8 NOT ((qualitative study [ti] OR qualitative studies [ti]) OR (((("Semi-structured" [TIAB] OR semistructured [TIAB] OR unstructured [TIAB] OR<br>4 informal [TIAB] OR "in-depth" [TIAB] OR indepth [TIAB] OR "face-to-face" [TIAB ] OR structured [TIAB] OR guide [TIAB] OR guides [TIAB]) AND<br>5 (interview* [TIAB] OR discussion* [TIAB] OR questionnaire* [TIAB])) OR ("focus group" [TIAB] OR "focus groups "[TIAB] OR qualitative [TIAB] OR<br>6 ethnograph* [TIAB] OR fieldwork [TIAB] OR "field work"[TIAB] OR "key informant" [TIAB])) OR "interviews as topic" [Mesh] OR "focus groups"<br>7 [Mesh] OR narration [Mesh] OR qualitative research [Mesh] OR "personal narratives as topic"[Mesh]))                                                                                                                                                                                                                                                                                                                                                                                                                                                                                                                                                                                                                                                                                                                                                                                                                                                                                                                                                                                                                                                                                                                                                                                                                                                                                                                                                                                                                                                                                                                                                                                                                                                                                                                                                                                                                                                                                                                                                                                                                                                                                                                                                                                                                                                                                                                                                                                                                                                                                                                                                                                                                                                                                                                                                                                                                                                                                                                                                                                                                                                                                                                                                                                                                                                                                                                                                                                                                                                                                                                                                                                                                                                                                                                                                                                                                                                                                                                                                                                                                                                                                  | 141     |           |
| 8 #7 NOT ((case reports [pt] OR comment [pt] OR editorial [pt] OR letter [pt] OR news [pt]))                                                                                                                                                                                                                                                                                                                                                                                                                                                                                                                                                                                                                                                                                                                                                                                                                                                                                                                                                                                                                                                                                                                                                                                                                                                                                                                                                                                                                                                                                                                                                                                                                                                                                                                                                                                                                                                                                                                                                                                                                                                                                                                                                                                                                                                                                                                                                                                                                                                                                                                                                                                                                                                                                                                                                                                                                                                                                                                                                                                                                                                                                                                                                                                                                                                                                                                                                                                                                                                                                                                                                                                                                                                                                                                                                                                                                                                                                                                                                                                                                                                                                                                                                                                                                                                                                                                                                                                                                                                                                                                                                                                                                                                                                                     | 230     |           |
| 9 #5 NOT (protocol [ti]) Filters: English, from 2000-2020                                                                                                                                                                                                                                                                                                                                                                                                                                                                                                                                                                                                                                                                                                                                                                                                                                                                                                                                                                                                                                                                                                                                                                                                                                                                                                                                                                                                                                                                                                                                                                                                                                                                                                                                                                                                                                                                                                                                                                                                                                                                                                                                                                                                                                                                                                                                                                                                                                                                                                                                                                                                                                                                                                                                                                                                                                                                                                                                                                                                                                                                                                                                                                                                                                                                                                                                                                                                                                                                                                                                                                                                                                                                                                                                                                                                                                                                                                                                                                                                                                                                                                                                                                                                                                                                                                                                                                                                                                                                                                                                                                                                                                                                                                                                        | 239     |           |
| 6 #5 NOT (protocol [ti])                                                                                                                                                                                                                                                                                                                                                                                                                                                                                                                                                                                                                                                                                                                                                                                                                                                                                                                                                                                                                                                                                                                                                                                                                                                                                                                                                                                                                                                                                                                                                                                                                                                                                                                                                                                                                                                                                                                                                                                                                                                                                                                                                                                                                                                                                                                                                                                                                                                                                                                                                                                                                                                                                                                                                                                                                                                                                                                                                                                                                                                                                                                                                                                                                                                                                                                                                                                                                                                                                                                                                                                                                                                                                                                                                                                                                                                                                                                                                                                                                                                                                                                                                                                                                                                                                                                                                                                                                                                                                                                                                                                                                                                                                                                                                                         | 245     |           |
| 5 #3 AND #4                                                                                                                                                                                                                                                                                                                                                                                                                                                                                                                                                                                                                                                                                                                                                                                                                                                                                                                                                                                                                                                                                                                                                                                                                                                                                                                                                                                                                                                                                                                                                                                                                                                                                                                                                                                                                                                                                                                                                                                                                                                                                                                                                                                                                                                                                                                                                                                                                                                                                                                                                                                                                                                                                                                                                                                                                                                                                                                                                                                                                                                                                                                                                                                                                                                                                                                                                                                                                                                                                                                                                                                                                                                                                                                                                                                                                                                                                                                                                                                                                                                                                                                                                                                                                                                                                                                                                                                                                                                                                                                                                                                                                                                                                                                                                                                      | 268     |           |
| 12 ("psychologic"[All Fields] OR "psychological"[All Fields] OR "psychologically"[All Fields] OR "psychologization"[All Fields] OR "psychologized"[All<br>13 Fields] OR "psychologizing"[All Fields]) OR (("psychologic"[All Fields] OR "psychological"[All Fields] OR "psychologically"[All Fields] OR<br>14 "psychologization"[All Fields] OR "psychologized"[All Fields] OR "psychologizing"[All Fields]) AND ("therapeutics"[MeSH Terms] OR<br>15 "therapeutics"[All Fields] OR "treatments"[All Fields] OR "therapy"[MeSH Subheading] OR "therapy"[All Fields] OR "treatment"[All Fields] OR<br>16 "treatment s"[All Fields]) OR "psychological treatment"[All Fields]) OR (("psychologic"[All Fields] OR "psychological"[All Fields] OR<br>17 "psychologically"[All Fields] OR "psychologization"[All Fields] OR "psychologized"[All Fields] OR "psychologizing"[All Fields]) AND ("intervention<br>18 s"[All Fields] OR "interventions"[All Fields] OR "interventive"[All Fields] OR "methods"[MeSH Terms] OR "methods"[All Fields] OR "intervention"[All<br>19 Fields] OR "interventional"[All Fields]) OR "psychological intervention") OR "empirically-supported"[All Fields] AND ("psychologic"[All Fields] OR<br>20 "psychological"[All Fields] OR "psychologically"[All Fields] OR "psychologization"[All Fields] OR "psychologized"[All Fields] OR "psychologizing"[All<br>21 Fields]) AND ("therapeutics"[MeSH Terms] OR "therapeutics"[All Fields] OR "treatments"[All Fields] OR "therapy"[MeSH Subheading] OR<br>22 "therapy"[All Fields] OR "treatment"[All Fields] OR "treatment s"[All Fields]) OR "empirically-supported psychological treatment"[All Fields] OR<br>23 ("evidence-based"[All Fields] AND ("psychologic"[All Fields] OR "psychological"[All Fields] OR "psychologically"[All Fields] OR "psychologization"[All<br>24 Fields] OR "psychologized"[All Fields] OR "psychologizing"[All Fields]) AND ("therapeutics"[MeSH Terms] OR "therapeutics"[All Fields] OR<br>25 "treatments"[All Fields] OR "therapy"[MeSH Subheading] OR "therapy"[All Fields] OR "treatment"[All Fields] OR "treatment s"[All Fields]) OR<br>26 "evidence-based psychological treatment") OR ("evidence-based"[All Fields] AND ("behavior therapy"[MeSH Terms] OR ("behavior"[All Fields] AND<br>27 "therapy"[All Fields]) OR "behavior therapy"[All Fields] OR ("behavioral"[All Fields] AND "treatment"[All Fields]) OR "behavioral treatment"[All<br>28 Fields]) OR "evidence-based behavioral treatment") OR ("evidence-based"[All Fields] AND ("behavior therapy"[MeSH Terms] OR ("behavior"[All<br>29 Fields] AND "therapy"[All Fields]) OR "behavior therapy"[All Fields] OR ("behavioural"[All Fields] AND "treatment"[All Fields]) OR "behavioural<br>30 treatment"[All Fields] OR "evidence-based behavioural treatment"[All Fields]) OR ("mental health"[MeSH Terms] OR ("mental"[All Fields] AND<br>31 "health"[All Fields]) OR "mental health"[All Fields]) OR ("cognitive behavioral therapy"[MeSH Terms] OR ("cognitive"[All Fields] AND "behavioral"[All<br>32 Fields] AND "therapy"[All Fields]) OR "cognitive behavioral therapy"[All Fields]) OR ("cognitive behavioral therapy"[MeSH Terms] OR ("cognitive"[All<br>33 Fields] AND "behavioral"[All Fields] AND "therapy"[All Fields]) OR "cognitive behavioural therapy"[All Fields]) OR ("behavior therapy"[MeSH Terms] OR<br>34 ("behavior"[All Fields] AND "therapy"[All Fields]) OR "behavior therapy"[All Fields] OR ("behavioral"[All Fields] AND "therapy"[All Fields]) OR<br>35 "behavioral therapy"[All Fields]) OR ("behavior therapy"[MeSH Terms] OR ("behavior"[All Fields] AND "therapy"[All Fields]) OR "behavior<br>36 therapy"[All Fields] OR ("behavioural"[All Fields] AND "therapy"[All Fields]) OR "behavioural therapy"[All Fields]) OR ("interpersonal"[All Fields] OR<br>37 "interpersonality"[All Fields] OR "interpersonally"[All Fields]) AND ("therapeutics"[MeSH Terms] OR "therapeutics"[All Fields] OR "therapies"[All<br>38 Fields] OR "therapy"[MeSH Subheading] OR "therapy"[All Fields] OR "therapy s"[All Fields] OR "therapys"[All Fields]) OR "interpersonal therapy"[All<br>39 Fields] OR "interpersonal therapies"[All Fields]) OR ("acceptance and commitment therapy"[MeSH Terms] OR ("acceptance"[All Fields] AND<br>40 "commitment"[All Fields] AND "therapy"[All Fields]) OR "acceptance and commitment therapy"[All Fields]) OR ("psychotherapie"[All Fields] OR<br>41 "psychotherapy"[MeSH Terms] OR "psychotherapy"[All Fields] OR "psychotherapies"[All Fields] OR "psychotherapy s"[All Fields]) OR ("motivational<br>42 interviewing"[MeSH Terms] OR ("motivational"[All Fields] AND "interviewing"[All Fields]) OR "motivational interviewing"[All Fields]) OR | 926,979 | EBPT      |

|    |                                                                                                                                                                                                                                                                                                           |         |               |
|----|-----------------------------------------------------------------------------------------------------------------------------------------------------------------------------------------------------------------------------------------------------------------------------------------------------------|---------|---------------|
| 1  | ((("interpersonal"[All Fields] OR "interpersonality"[All Fields] OR "interpersonally"[All Fields]) AND ("therapeutics"[MeSH Terms] OR "therapeutics"[All Fields] OR "therapies"[All Fields] OR "therapy"[MeSH Subheading] OR "therapy"[All Fields] OR "therapy s"[All Fields] OR "therapys"[All Fields])) |         |               |
| 2  |                                                                                                                                                                                                                                                                                                           |         |               |
| 3  | 3 #1 AND #2                                                                                                                                                                                                                                                                                               | 1,019   |               |
| 4  |                                                                                                                                                                                                                                                                                                           |         |               |
| 5  | 2 "task sharing"[All Fields] OR "task shifting"[All Fields] OR "care sharing"[All Fields]                                                                                                                                                                                                                 | 1,491   | Task-shifting |
| 6  | ((("community health workers"[MeSH Terms] OR ("community"[All Fields] AND "health"[All Fields] AND "workers"[All Fields]) OR "community health workers"[All Fields] OR ("community"[All Fields] AND "health"[All Fields] AND "worker"[All Fields]) or "community health worker"[All Fields])) OR          |         |               |
| 7  | ((("church"[All Fields] OR "church s"[All Fields] OR "churches"[All Fields])) OR (((("community"[All Fields] AND ("facilitate"[All Fields] OR                                                                                                                                                             |         |               |
| 8  | "facilitated"[All Fields] OR "facilitates"[All Fields] OR "facilitating"[All Fields] OR "facilitation"[All Fields] OR "facilitations"[All Fields] OR                                                                                                                                                      |         |               |
| 9  | "facilitative"[All Fields] OR "facilitator"[All Fields] OR "facilitator s"[All Fields] OR "facilitators"[All Fields])) OR "community based facilitator"[All                                                                                                                                               |         |               |
| 10 | Fields)) OR (((("community"[All Fields] AND ("organisation"[All Fields] OR "organization and administration"[MeSH Subheading] OR                                                                                                                                                                          |         |               |
| 11 | ("organization"[All Fields])) OR "community based organization" [All Fields]) OR ("health workforce"[MeSH Terms] OR ("health"[All Fields] AND                                                                                                                                                             |         |               |
| 12 | "workforce"[All Fields]) OR "health workforce"[All Fields] OR ("health"[All Fields] AND "manpower"[All Fields]) OR "health manpower"[All Fields]) OR                                                                                                                                                      |         |               |
| 13 | ("lay"[All Fields] AND ("counsellor"[All Fields] OR "counselors"[MeSH Terms] OR "counselors"[All Fields] OR "counselor"[All Fields] OR                                                                                                                                                                    |         |               |
| 14 | "counseling"[MeSH Terms] OR "counseling"[All Fields] OR "counsellor s"[All Fields] OR "counsellors"[All Fields] OR "counselor s"[All Fields]) OR "lay                                                                                                                                                     |         |               |
| 15 | counselor" [All Fields] OR "lay counsellor"[All Fields]) OR ("lay"[All Fields] AND ("health"[MeSH Terms] OR "health"[All Fields] OR "health s"[All                                                                                                                                                        |         |               |
| 16 | Fields)) AND ("occupational groups"[MeSH Terms] OR ("occupational"[All Fields] AND "groups"[All Fields]) OR "occupational groups"[All Fields] OR                                                                                                                                                          |         |               |
| 17 | "worker"[All Fields] OR "workers"[All Fields] OR "worker s"[All Fields]) OR "lay health worker" [All Fields]) OR ("non"[All Fields] AND ("licence"[All                                                                                                                                                    |         |               |
| 18 | Fields] OR "licensure"[MeSH Terms] OR "licensure"[All Fields] OR "license"[All Fields] OR "licenced"[All Fields] OR "licences"[All Fields] OR                                                                                                                                                             |         |               |
| 19 | "licencing"[All Fields] OR "licensed"[All Fields] OR "licenses"[All Fields] OR "licensing"[All Fields] OR "non-licensed"[All Fields] OR "nonlicensed" [All                                                                                                                                                |         |               |
| 20 | Fields] OR "non-licenced" [All Fields] OR "nonlicenced" [All Fields]) OR ("nonprofessional"[All Fields] OR "nonprofessionals"[All Fields]) OR ("non-                                                                                                                                                      |         |               |
| 21 | specialist" [All Fields] OR "non-specialists" [All Fields] OR "nonspecialist" [All Fields] OR "nonspecialists" [All Fields]) OR ("patient care team"[MeSH                                                                                                                                                 |         |               |
| 22 | Terms] OR ("patient"[All Fields] AND "care"[All Fields] AND "team"[All Fields]) OR "patient care team"[All Fields] OR ("patient"[All Fields] AND                                                                                                                                                          |         |               |
| 23 | "care"[All Fields] AND "teams"[All Fields]) OR "patient care teams"[All Fields]) OR ("patient navigation"[MeSH Terms] OR ("patient"[All Fields] AND                                                                                                                                                       |         |               |
| 24 | "navigation"[All Fields]) OR "patient navigation"[All Fields] OR ("patient"[All Fields] AND "navigator"[All Fields]) OR "patient navigator"[All Fields])                                                                                                                                                  |         |               |
| 25 | OR ("peer" [all fields]) OR ("peer-coach" [all fields]) OR ("peer-counselor"[All Fields]) OR ("peer-counsellor"[All Fields]) OR ("peer-facilitator"[All                                                                                                                                                   |         |               |
| 26 | Fields]) OR ("promotor"[All Fields] OR "promotors"[All Fields]) OR ("promotora"[All Fields] OR "promotoras"[All Fields]) OR ("promotores"[All Fields])                                                                                                                                                    |         |               |
| 27 | OR ("self care"[MeSH Terms] OR ("self"[All Fields] AND "care"[All Fields]) OR "self care"[All Fields]) OR ("self management"[MeSH Terms] OR "self                                                                                                                                                         |         |               |
| 28 | management"[All Fields] OR ("self"[All Fields] AND "management"[All Fields]) OR "self management"[All Fields]) OR ("share"[All Fields] OR                                                                                                                                                                 |         |               |
| 29 | "shared"[All Fields] OR "shares"[All Fields] OR "sharing"[All Fields] OR "sharings"[All Fields]) AND "care"[All Fields] OR "shared care" [All Fields]) OR                                                                                                                                                 |         |               |
| 30 | ((("tradition"[All Fields] OR "tradition s"[All Fields] OR "traditional"[All Fields] OR "traditionals"[All Fields] OR "traditions"[All Fields]) AND ("healer"[All                                                                                                                                         |         |               |
| 31 | Fields] OR "healer s"[All Fields] OR "healers"[All Fields]) OR "traditional healer"[All Fields]) OR ("unlicensed"[All Fields] OR ("nonphysician"[All Fields]                                                                                                                                              |         |               |
| 32 | OR "nonphysicians"[All Fields]) OR ((("physician"[All Fields] AND "extender"[All Fields]) OR "physician extender"[All Fields]) OR ("CHW"[all fields])                                                                                                                                                     | 767,391 | Lay worker    |
| 33 |                                                                                                                                                                                                                                                                                                           |         |               |
| 34 |                                                                                                                                                                                                                                                                                                           |         |               |
| 35 |                                                                                                                                                                                                                                                                                                           |         |               |
| 36 |                                                                                                                                                                                                                                                                                                           |         |               |
| 37 |                                                                                                                                                                                                                                                                                                           |         |               |
| 38 |                                                                                                                                                                                                                                                                                                           |         |               |
| 39 |                                                                                                                                                                                                                                                                                                           |         |               |
| 40 |                                                                                                                                                                                                                                                                                                           |         |               |
| 41 |                                                                                                                                                                                                                                                                                                           |         |               |
| 42 |                                                                                                                                                                                                                                                                                                           |         |               |
| 43 |                                                                                                                                                                                                                                                                                                           |         |               |
| 44 |                                                                                                                                                                                                                                                                                                           |         |               |
| 45 |                                                                                                                                                                                                                                                                                                           |         |               |
| 46 |                                                                                                                                                                                                                                                                                                           |         |               |
| 47 |                                                                                                                                                                                                                                                                                                           |         |               |

# Reporting checklist for protocol of a systematic review.

Based on the PRISMA-P guidelines.

## Instructions to authors

Complete this checklist by entering the page numbers from your manuscript where readers will find each of the items listed below.

Your article may not currently address all the items on the checklist. Please modify your text to include the missing information. If you are certain that an item does not apply, please write "n/a" and provide a short explanation.

Upload your completed checklist as an extra file when you submit to a journal.

In your methods section, say that you used the PRISMA-Reporting guidelines, and cite them as:

Moher D, Shamseer L, Clarke M, Ghersi D, Liberati A, Petticrew M, Shekelle P, Stewart LA. Preferred Reporting Items for Systematic Review and Meta-Analysis Protocols (PRISMA-P) 2015 statement. *Syst Rev.* 2015;4(1):1.

| Reporting Item      |                                                                                                                                                               | Page Number |
|---------------------|---------------------------------------------------------------------------------------------------------------------------------------------------------------|-------------|
| <b>Title</b>        |                                                                                                                                                               |             |
| Identification      | <a href="#">#1a</a> Identify the report as a protocol of a systematic review                                                                                  | 1           |
| Update              | <a href="#">#1b</a> If the protocol is for an update of a previous systematic review, identify as such                                                        | N/A         |
| <b>Registration</b> |                                                                                                                                                               |             |
|                     | <a href="#">#2</a> If registered, provide the name of the registry (such as PROSPERO) and registration number                                                 | N/A         |
| <b>Authors</b>      |                                                                                                                                                               |             |
| Contact             | <a href="#">#3a</a> Provide name, institutional affiliation, e-mail address of all protocol authors; provide physical mailing address of corresponding author | 1-2         |
| Contribution        | <a href="#">#3b</a> Describe contributions of protocol authors and identify the guarantor of the review                                                       | 14          |

## Amendments

|    |                      |                                                                                               |        |
|----|----------------------|-----------------------------------------------------------------------------------------------|--------|
| 1  | <a href="#">#4</a>   | If the protocol represents an amendment of a previously completed                             | 12     |
| 2  |                      | or published protocol, identify as such and list changes; otherwise,                          |        |
| 3  |                      | state plan for documenting important protocol amendments                                      |        |
| 4  |                      |                                                                                               |        |
| 5  |                      |                                                                                               |        |
| 6  | <b>Support</b>       |                                                                                               |        |
| 7  |                      |                                                                                               |        |
| 8  | Sources              | <a href="#">#5a</a> Indicate sources of financial or other support for the review             | 13     |
| 9  |                      |                                                                                               |        |
| 10 | Sponsor              | <a href="#">#5b</a> Provide name for the review funder and / or sponsor                       | 13     |
| 11 |                      |                                                                                               |        |
| 12 | Role of sponsor or   | <a href="#">#5c</a> Describe roles of funder(s), sponsor(s), and / or institution(s), if any, | N/A    |
| 13 | funder               | in developing the protocol                                                                    |        |
| 14 |                      |                                                                                               |        |
| 15 |                      |                                                                                               |        |
| 16 | <b>Introduction</b>  |                                                                                               |        |
| 17 |                      |                                                                                               |        |
| 18 | Rationale            | <a href="#">#6</a> Describe the rationale for the review in the context of what is            | 4-6    |
| 19 |                      | already known                                                                                 |        |
| 20 |                      |                                                                                               |        |
| 21 | Objectives           | <a href="#">#7</a> Provide an explicit statement of the question(s) the review will           | 6      |
| 22 |                      | address with reference to participants, interventions, comparators,                           |        |
| 23 |                      | and outcomes (PICO)                                                                           |        |
| 24 |                      |                                                                                               |        |
| 25 |                      |                                                                                               |        |
| 26 |                      |                                                                                               |        |
| 27 |                      |                                                                                               |        |
| 28 | <b>Methods</b>       |                                                                                               |        |
| 29 |                      |                                                                                               |        |
| 30 | Eligibility criteria | <a href="#">#8</a> Specify the study characteristics (such as PICO, study design,             | 7-9    |
| 31 |                      | setting, time frame) and report characteristics (such as years                                |        |
| 32 |                      | considered, language, publication status) to be used as criteria for                          |        |
| 33 |                      | eligibility for the review                                                                    |        |
| 34 |                      |                                                                                               |        |
| 35 | Information sources  | <a href="#">#9</a> Describe all intended information sources (such as electronic              | 9      |
| 36 |                      | databases, contact with study authors, trial registers or other grey                          |        |
| 37 |                      | literature sources) with planned dates of coverage                                            |        |
| 38 |                      |                                                                                               |        |
| 39 | Search strategy      | <a href="#">#10</a> Present draft of search strategy to be used for at least one electronic   | 9-10 & |
| 40 |                      | database, including planned limits, such that it could be repeated                            | Suppl  |
| 41 |                      |                                                                                               |        |
| 42 |                      |                                                                                               |        |
| 43 | Study records - data | <a href="#">#11a</a> Describe the mechanism(s) that will be used to manage records and        | 10-11  |
| 44 | management           | data throughout the review                                                                    |        |
| 45 |                      |                                                                                               |        |
| 46 | Study records -      | <a href="#">#11b</a> State the process that will be used for selecting studies (such as two   | 10-11  |
| 47 | selection process    | independent reviewers) through each phase of the review (that is,                             |        |
| 48 |                      | screening, eligibility and inclusion in meta-analysis)                                        |        |
| 49 |                      |                                                                                               |        |
| 50 |                      |                                                                                               |        |
| 51 |                      |                                                                                               |        |
| 52 |                      |                                                                                               |        |
| 53 |                      |                                                                                               |        |
| 54 |                      |                                                                                               |        |
| 55 |                      |                                                                                               |        |
| 56 |                      |                                                                                               |        |
| 57 |                      |                                                                                               |        |
| 58 |                      |                                                                                               |        |
| 59 |                      |                                                                                               |        |
| 60 |                      |                                                                                               |        |

|    |                      |                      |                                                                       |       |
|----|----------------------|----------------------|-----------------------------------------------------------------------|-------|
| 1  | Study records - data | <a href="#">#11c</a> | Describe planned method of extracting data from reports (such as      | 10-11 |
| 2  | collection process   |                      | piloting forms, done independently, in duplicate), any processes for  |       |
| 3  |                      |                      | obtaining and confirming data from investigators                      |       |
| 4  |                      |                      |                                                                       |       |
| 5  |                      |                      |                                                                       |       |
| 6  | Data items           | <a href="#">#12</a>  | List and define all variables for which data will be sought (such as  | 10-11 |
| 7  |                      |                      | PICO items, funding sources), any pre-planned data assumptions        |       |
| 8  |                      |                      | and simplifications                                                   |       |
| 9  |                      |                      |                                                                       |       |
| 10 |                      |                      |                                                                       |       |
| 11 | Outcomes and         | <a href="#">#13</a>  | List and define all outcomes for which data will be sought,           | 11-12 |
| 12 | prioritization       |                      | including prioritization of main and additional outcomes, with        |       |
| 13 |                      |                      | rationale                                                             |       |
| 14 |                      |                      |                                                                       |       |
| 15 |                      |                      |                                                                       |       |
| 16 |                      |                      |                                                                       |       |
| 17 | Risk of bias in      | <a href="#">#14</a>  | Describe anticipated methods for assessing risk of bias of individual | 11    |
| 18 | individual studies   |                      | studies, including whether this will be done at the outcome or study  |       |
| 19 |                      |                      | level, or both; state how this information will be used in data       |       |
| 20 |                      |                      | synthesis                                                             |       |
| 21 |                      |                      |                                                                       |       |
| 22 |                      |                      |                                                                       |       |
| 23 | Data synthesis       | <a href="#">#15a</a> | Describe criteria under which study data will be quantitatively       | 12    |
| 24 |                      |                      | synthesised                                                           |       |
| 25 |                      |                      |                                                                       |       |
| 26 |                      |                      |                                                                       |       |
| 27 | Data synthesis       | <a href="#">#15b</a> | If data are appropriate for quantitative synthesis, describe planned  | N/A   |
| 28 |                      |                      | summary measures, methods of handling data and methods of             |       |
| 29 |                      |                      | combining data from studies, including any planned exploration of     |       |
| 30 |                      |                      | consistency (such as I <sup>2</sup> , Kendall's $\tau$ )              |       |
| 31 |                      |                      |                                                                       |       |
| 32 |                      |                      |                                                                       |       |
| 33 |                      |                      |                                                                       |       |
| 34 | Data synthesis       | <a href="#">#15c</a> | Describe any proposed additional analyses (such as sensitivity or     | N/A   |
| 35 |                      |                      | subgroup analyses, meta-regression)                                   |       |
| 36 |                      |                      |                                                                       |       |
| 37 |                      |                      |                                                                       |       |
| 38 | Data synthesis       | <a href="#">#15d</a> | If quantitative synthesis is not appropriate, describe the type of    | 12    |
| 39 |                      |                      | summary planned                                                       |       |
| 40 |                      |                      |                                                                       |       |
| 41 |                      |                      |                                                                       |       |
| 42 | Meta-bias(es)        | <a href="#">#16</a>  | Specify any planned assessment of meta-bias(es) (such as              | 11    |
| 43 |                      |                      | publication bias across studies, selective reporting within studies)  |       |
| 44 |                      |                      |                                                                       |       |
| 45 |                      |                      |                                                                       |       |
| 46 | Confidence in        | <a href="#">#17</a>  | Describe how the strength of the body of evidence will be assessed    | 11-12 |
| 47 | cumulative           |                      | (such as GRADE)                                                       |       |
| 48 | evidence             |                      |                                                                       |       |
| 49 |                      |                      |                                                                       |       |
| 50 |                      |                      |                                                                       |       |

The PRISMA-P checklist is distributed under the terms of the Creative Commons Attribution License CC-BY 4.0. This checklist was completed on 19. August 2020 using <https://www.goodreports.org/>, a tool made by the [EQUATOR Network](#) in collaboration with [Penelope.ai](#)

# BMJ Open

## Methodology for task-shifting evidence-based psychological treatments to non-licensed/lay health workers: Protocol for a systematic review

|                                 |                                                                                                                                                                                                                                                                                                                                                                                                                                                                                                                                                                                                                                                                                                                                                                                                                                                                                                                                                                                                                                                                                                                                                                                                                                                                                                                                                                                                                                                                                 |
|---------------------------------|---------------------------------------------------------------------------------------------------------------------------------------------------------------------------------------------------------------------------------------------------------------------------------------------------------------------------------------------------------------------------------------------------------------------------------------------------------------------------------------------------------------------------------------------------------------------------------------------------------------------------------------------------------------------------------------------------------------------------------------------------------------------------------------------------------------------------------------------------------------------------------------------------------------------------------------------------------------------------------------------------------------------------------------------------------------------------------------------------------------------------------------------------------------------------------------------------------------------------------------------------------------------------------------------------------------------------------------------------------------------------------------------------------------------------------------------------------------------------------|
| Journal:                        | <i>BMJ Open</i>                                                                                                                                                                                                                                                                                                                                                                                                                                                                                                                                                                                                                                                                                                                                                                                                                                                                                                                                                                                                                                                                                                                                                                                                                                                                                                                                                                                                                                                                 |
| Manuscript ID                   | bmjopen-2020-044012.R2                                                                                                                                                                                                                                                                                                                                                                                                                                                                                                                                                                                                                                                                                                                                                                                                                                                                                                                                                                                                                                                                                                                                                                                                                                                                                                                                                                                                                                                          |
| Article Type:                   | Protocol                                                                                                                                                                                                                                                                                                                                                                                                                                                                                                                                                                                                                                                                                                                                                                                                                                                                                                                                                                                                                                                                                                                                                                                                                                                                                                                                                                                                                                                                        |
| Date Submitted by the Author:   | 23-Dec-2020                                                                                                                                                                                                                                                                                                                                                                                                                                                                                                                                                                                                                                                                                                                                                                                                                                                                                                                                                                                                                                                                                                                                                                                                                                                                                                                                                                                                                                                                     |
| Complete List of Authors:       | <p>Kanzler, Kathryn; UT Health San Antonio, Research to Advance Community Health (ReACH) Center; UT Health San Antonio, Psychiatry &amp; Behavioral Sciences</p> <p>Kilpela, Lisa; UT Health San Antonio, Research to Advance Community Health (ReACH) Center; UT Health San Antonio, Psychiatry &amp; Behavioral Sciences</p> <p>Pugh, Jaqueline; UT Health San Antonio, Department of Medicine, Division of General and Hospital Medicine</p> <p>Garcini, Luz; UT Health San Antonio, Research to Advance Community Health (ReACH) Center</p> <p>Gaspard, Christine; UT Health San Antonio, Briscoe Library, Long School of Medicine</p> <p>Aikens, James; University of Michigan Medical School, Family Medicine</p> <p>Reynero, Erick; UT Health San Antonio, Research to Advance Community Health (ReACH) Center</p> <p>Tsevat, Joel; UT Health San Antonio, Research to Advance Community Health (ReACH) Center; The University of Texas at Austin Dell Medical School</p> <p>Lopez, Eliot; UT Health San Antonio, Psychiatry &amp; Behavioral Sciences</p> <p>Johnson-Esparza, Yajaira; UT Health San Antonio, Family &amp; Community Medicine</p> <p>Ramirez, Amelie G.; UT Health San Antonio, Population Health Sciences; UT Health San Antonio, Institute for Health Promotion Research</p> <p>Finley, Erin; UT Health San Antonio, Department of Medicine, Division of General and Hospital Medicine; South Texas Veterans Health Care System, Research Service</p> |
| <b>Primary Subject Heading</b>: | Mental health                                                                                                                                                                                                                                                                                                                                                                                                                                                                                                                                                                                                                                                                                                                                                                                                                                                                                                                                                                                                                                                                                                                                                                                                                                                                                                                                                                                                                                                                   |
| Secondary Subject Heading:      | Health services research, Public health, Global health, Evidence based practice                                                                                                                                                                                                                                                                                                                                                                                                                                                                                                                                                                                                                                                                                                                                                                                                                                                                                                                                                                                                                                                                                                                                                                                                                                                                                                                                                                                                 |
| Keywords:                       | MENTAL HEALTH, PUBLIC HEALTH, Organisation of health services < HEALTH SERVICES ADMINISTRATION & MANAGEMENT                                                                                                                                                                                                                                                                                                                                                                                                                                                                                                                                                                                                                                                                                                                                                                                                                                                                                                                                                                                                                                                                                                                                                                                                                                                                                                                                                                     |
|                                 |                                                                                                                                                                                                                                                                                                                                                                                                                                                                                                                                                                                                                                                                                                                                                                                                                                                                                                                                                                                                                                                                                                                                                                                                                                                                                                                                                                                                                                                                                 |

1  
2  
3  
4  
5  
6  
7  
8  
9  
10  
11  
12  
13  
14  
15  
16  
17  
18  
19  
20  
21  
22  
23  
24  
25  
26  
27  
28  
29  
30  
31  
32  
33  
34  
35  
36  
37  
38  
39  
40  
41  
42  
43  
44  
45  
46  
47  
48  
49  
50  
51  
52  
53  
54  
55  
56  
57  
58  
59  
60

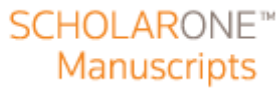





I, the Submitting Author has the right to grant and does grant on behalf of all authors of the Work (as defined in the below author licence), an exclusive licence and/or a non-exclusive licence for contributions from authors who are: i) UK Crown employees; ii) where BMJ has agreed a CC-BY licence shall apply, and/or iii) in accordance with the terms applicable for US Federal Government officers or employees acting as part of their official duties; on a worldwide, perpetual, irrevocable, royalty-free basis to BMJ Publishing Group Ltd ("BMJ") its licensees and where the relevant Journal is co-owned by BMJ to the co-owners of the Journal, to publish the Work in this journal and any other BMJ products and to exploit all rights, as set out in our [licence](#).

The Submitting Author accepts and understands that any supply made under these terms is made by BMJ to the Submitting Author unless you are acting as an employee on behalf of your employer or a postgraduate student of an affiliated institution which is paying any applicable article publishing charge ("APC") for Open Access articles. Where the Submitting Author wishes to make the Work available on an Open Access basis (and intends to pay the relevant APC), the terms of reuse of such Open Access shall be governed by a Creative Commons licence – details of these licences and which [Creative Commons](#) licence will apply to this Work are set out in our licence referred to above.

Other than as permitted in any relevant BMJ Author's Self Archiving Policies, I confirm this Work has not been accepted for publication elsewhere, is not being considered for publication elsewhere and does not duplicate material already published. I confirm all authors consent to publication of this Work and authorise the granting of this licence.

1  
2  
3  
4  
5  
6  
7  
8  
9  
10  
11  
12 Methodology for task-shifting evidence-based psychological treatments to non-licensed/lay  
13  
14 health workers: Protocol for a systematic review  
15  
16  
17  
18

19 Kathryn E. Kanzler <sup>1,2,3</sup>

20 Lisa Smith Kilpela <sup>1,2,4</sup>

21 Jaqueline Pugh <sup>5</sup>

22 Luz M. Garcini <sup>1,5</sup>

23 Christine Gaspard <sup>6</sup>

24 James E. Aikens <sup>7</sup>

25 Erick Reynero <sup>1</sup>

26 Joel Tsevat <sup>1,5</sup>

27 Eliot Lopez <sup>2,3</sup>

28 Yajaira Johnson-Esparza <sup>3</sup>

29 Amelie Ramirez <sup>8</sup>

30 Erin P. Finley <sup>1,5,2,9</sup>

- 31  
32  
33  
34  
35  
36  
37  
38  
39  
40  
41  
42  
43  
44  
45  
46  
47  
48  
49  
50 1. Center for Research to Advance Community Health (ReACH); University of Texas  
51 Health Science Center at San Antonio, San Antonio, TX, USA  
52 2. Department of Psychiatry & Behavioral Sciences; University of Texas Health Science  
53 Center at San Antonio, San Antonio, TX, USA  
54 3. Department of Family & Community Medicine; University of Texas Health Science  
55 Center at San Antonio, San Antonio, TX, USA  
56  
57  
58  
59  
60

4. Barshop Institute for Longevity and Aging Studies, University of Texas Health Science Center at San Antonio, San Antonio, TX, USA
5. Department of Medicine, University of Texas Health Science Center at San Antonio, San Antonio, TX, USA
6. Briscoe Library, Long School of Medicine, University of Texas Health Science Center at San Antonio, San Antonio, TX, USA
7. Department of Family Medicine, University of Michigan, Ann Arbor, MI, USA
8. Department of Population Health Sciences, University of Texas Health Science Center at San Antonio, San Antonio, TX, USA
9. South Texas Veterans Healthcare System, San Antonio, TX, USA

**Corresponding author:** Kathryn E. Kanzler, PsyD, ABPP, Center for Research to Advance Community Health (ReACH), University of Texas Health Science Center San Antonio, 7703 Floyd Curl Dr, Mail Code 7768, San Antonio, TX 78229, USA  
Email: [Kanzler@uthscsa.edu](mailto:Kanzler@uthscsa.edu)

Word count: 2179

## ABSTRACT

**Introduction:** “Task-shifting” or “task-sharing” is an effective strategy for delivering behavioral health care in lower-resource communities. However, little is known regarding the actual steps (methods) in carrying out a task-shifting project. This paper presents a protocol for a systematic review that will identify steps in adapting an evidence-based psychological treatment for delivery by lay/non-licensed personnel.

**Methods and analysis:** A systematic review of peer-reviewed, published studies involving a non-licensed, non-specialist (e.g., community health worker, promotor/a, peer, lay person) delivering an evidence-based psychological treatment for adults will be conducted. Study design of selected articles must include a statistical comparison (e.g., randomized controlled trials, quasi-experimental trials, pre-post designs, pragmatic trials). Study selection will follow the Preferred Reporting Items for Systematic Review and Meta-analysis (PRISMA) guidelines. Databases including PubMed, the Cochrane Library, Cochrane Central Register of Controlled Trials (CENTRAL), SCOPUS, Cumulative Index to Nursing and Allied Health Literature (CINAHL), APA PsycInfo, and Google Scholar will be searched from 2000-2020. Risk of bias will be assessed using the Cochrane Collaboration’s Risk of Bias (RoB 2) tool, and publication bias will be evaluated with the Cochrane GRADE approach. A narrative synthesis will be conducted for all included studies and a summary table following Proctor’s framework for operationalizing implementation strategies will be included. This protocol was developed following the 2015 guidelines of PRISMA-Protocols.

**Ethics and dissemination:** This review will analyze data from published studies only, thus it will not require Institutional Board Review. Findings will be presented at conferences, to the broader community via the Community Health Worker Translational Advisory Board and social media, and the final systematic review will be published in a peer-reviewed journal.

**Key Words:** Task-shifting; evidence-based psychological treatment; lay health worker; treatment delivery

### Article Summary

Strengths & limitations:

- This protocol describes a planned systematic review to identify best-practices for task-shifting evidence-based psychological treatments to non-licensed/lay health workers
- We will use established operationalized terms to identify and describe implementation strategies
- Studies will be identified via a thorough search strategy using independent data extraction techniques, with risk of bias mitigation strategies
- This protocol adheres to the 17-item checklist, Preferred Reporting Items for Systematic review and Meta-analysis Protocols (PRISMA-P)
- The review will only include studies in English and focuses on non-licensed/lay health workers (e.g., not nurses or teachers), and identifies only studies examining delivery of psychological treatments (i.e., not education or other programming).

## INTRODUCTION

Mental health disorders are common worldwide<sup>1</sup> and although there are evidence-based psychological treatments (EBPTs) that improve health outcomes, most of the people who need treatment do not receive it.<sup>2</sup> Mental health treatment is often provided by licensed mental health professionals in specialty settings<sup>3</sup>. These specialty providers may not be available due to workforce shortages, cost of care, and/or access difficulty, especially for lower-income and economically challenged populations<sup>4</sup>, who disproportionately suffer from physical and mental health concerns<sup>5 6</sup>.

Dissemination and implementation of EBPTs (e.g., cognitive behavioral therapy) to communities in need requires a multidimensional approach with innovative delivery methods.<sup>7</sup> “Task-shifting” or “task-sharing” is one notable strategy that has emerged over the past two decades, largely in low-and middle-income countries, as a method for delivering health care in lower-resource communities. As described by the World Health Organization, with task-shifting, “specific tasks are moved, where appropriate, from highly qualified health workers to health workers with shorter training and fewer qualifications in order to make more efficient use of the available human resources for health.”<sup>8</sup>

Task-shifting has great promise in improving access to EBPTs. A recent review of 27 trials in low-and middle-income countries found that task-shifted EBPTs delivered by lay persons in primary care and community settings produced a pooled effect size of 0.49.<sup>9</sup> Findings from this review indicate that EBPTs can be task-shifted and maintain effectiveness, while delivered in nontraditional settings that improve scalability. Lay health workers, such as community health workers or promotor/as, are often trusted members of their communities and perform many important roles, such as delivering physical health care,<sup>10 11</sup> mental health care,<sup>12-</sup>

1  
2  
3 14 and providing pandemic-related support.<sup>15 16</sup> Lay health workers help increase access to  
4 healthcare in lower-resource areas around the world. Therefore, task-shifting EBPTs to lay  
5 personnel or paraprofessionals can help reduce disparities in access to evidence-based mental  
6 healthcare, thus improving health equity<sup>8 17</sup>.

### 11 12 **Task-shifted psychological treatments**

13  
14 Many different EBPTs have been effectively task-shifted with cultural and contextual  
15 adaptations. For example, Patel and colleagues<sup>18</sup> developed a task-shifted treatment program for  
16 moderately-severe to severe depression based on Behavioral Activation<sup>19</sup>, an established EBPT.  
17 Their rigorous randomized controlled trial (RCT) in India showed that the Healthy Activity  
18 Program (HAP), delivered by non-specialist lay counselors in primary care, significantly  
19 improved patients' levels of depression (moderate effect size) and led to remission in almost  
20 two-thirds of patients treated.<sup>18</sup> Likewise, the "Friendship Bench" program by Chibanda and  
21 colleagues<sup>20</sup> was a task-shifting study conducted in Zimbabwe to address depression and  
22 common mental disorders. Their treatment program was based on Problem Solving Therapy<sup>21</sup>, an  
23 established EBPT<sup>22</sup>, and was delivered by lay health workers in a population with a high  
24 prevalence of people living with HIV. Results of their initial non-controlled clinical trial and a  
25 later RCT<sup>23</sup> showed that this approach was efficacious in reducing psychological morbidity; a  
26 large cluster RCT is now underway.<sup>24</sup> In both the HAP and the Friendship Bench studies, lay  
27 health workers were trained and supervised by licensed professional specialists (i.e., clinical  
28 psychologists and/or psychiatrists).

29  
30  
31  
32  
33  
34  
35  
36  
37  
38  
39  
40  
41  
42  
43  
44  
45  
46  
47  
48  
49 While task-shifting is a recognized method for disseminating EBPTs, the best-practice  
50 procedural steps for *how* to task-shift are unclear. A recognized problem in implementation  
51 research is that strategies are "often inconsistently labeled and poorly described ... lack  
52  
53  
54  
55  
56  
57  
58  
59  
60

operational definitions ... and are part of ‘packaged’ approaches whose specific elements are poorly understood” (p.254)<sup>25</sup>. Efforts to scale up EBPTs are critical, yet there is no straightforward roadmap for how to implement task-shifting in new settings. This gap in the literature leaves interested stakeholders without clear guidance in deploying this promising implementation strategy. Therefore, we seek to operationalize such strategies used in task-shifting projects. Our research question is: *What are the best practices in task-shifting an EBPT for delivery by lay/non-licensed personnel, including methods of (a) adapting the treatment for the new delivery context; (b) training lay personnel; (c) implementing the new treatment protocol and maintaining fidelity; and (d) sustaining the task-shifted program over time?*

## Objectives

This protocol outlines our specific methods and planned analyses for a systematic review. This paper adheres to the Preferred Reporting Items for Systematic review and Meta-analysis Protocols (PRISMA-P).<sup>26</sup> The systematic review seeks to identify specific task-shifting strategies using established definitions as described by Proctor and colleagues.<sup>25 27</sup> In Proctor’s framework for operationalizing implementation strategies, there are 7 dimensions to consider: *The Actor, The Action, Action Target, Temporality, Dose, The Implementation Outcome Affected,* and *The Justification*. Our review will focus on identifying each of these strategies employed in task-shifting studies, operationally defined in Table 1. The most important outcome of this review is to identify best practices for conducting task-shifting implementation projects.

| <b><i>Dimension</i></b> | <b><i>Operational definition for the planned systematic review</i></b>                                                                                                                                                   |
|-------------------------|--------------------------------------------------------------------------------------------------------------------------------------------------------------------------------------------------------------------------|
| <b>Actors</b>           | Those persons delivering the implementation strategy                                                                                                                                                                     |
| <b>Actions</b>          | The methodology used to (a) adapt the treatment for the new delivery context, (b) train the lay personnel to protocol adherence, (c) implement the new treatment protocol with fidelity, and (d) sustain the new program |
| <b>Action target</b>    | The focus of the task-shifting strategy, including the type of personnel delivering the intervention and the recipients                                                                                                  |
| <b>Temporality</b>      | The order/sequence of the action strategies                                                                                                                                                                              |

|                                        |                                                                                                                                                                                                      |
|----------------------------------------|------------------------------------------------------------------------------------------------------------------------------------------------------------------------------------------------------|
| <b>Dose</b>                            | The amount or intensity of the actions, and how much those doses differ from standard/non-shifted EBPTs                                                                                              |
| <b>Implementation outcome affected</b> | Identification of which outcome—acceptability, adoption, appropriateness, feasibility, fidelity, implementation cost, penetration, and/or sustainability—is being targeted by the actions identified |
| <b>Justification</b>                   | Theoretical, empirical and/or pragmatic rationale for the strategies used to implement their intervention                                                                                            |

Table 1. Dimensions and definitions of task-shifting strategies for the proposed systematic review.

## Methods and Analysis

### Eligibility criteria

#### *Types of studies*

*Study Inclusion Criteria:* 1. Studies must involve a non-licensed, non-specialist (e.g., community health worker, promotor/a, peer, lay person) who is delivering the intervention; 2. Studies must address a “behavioral health” problem, broadly defined as any psychological/mental health issue (e.g., depression, eating disorders, substance use) and/or physical health concern (e.g., chronic disease management, health behavior change, lifestyle changes, adherence) using behavioral/psychological strategies. 3. The treatment components that have been shifted must be derived from an EBPT that has been found efficacious in at least 1 prior peer-reviewed RCT (e.g., cognitive behavioral therapy, motivational interviewing, behavioral activation, interpersonal psychotherapy). 4. The studies must include a statistical comparison of some kind. The comparator condition must be any of the following: baseline functioning of participants (as in pre-post design); or in an RCT, the control group must be attentional control, a waitlist control, a non-treated group, a treatment-as-usual group, a group receiving a different form of treatment, or a group receiving treatment delivered by an expert provider (e.g., licensed psychologist). Eligible study designs also include RCTs, quasi-experimental trials, pre-post designs, pragmatic trials (e.g., using stepped wedge or cluster RCT designs). 5. Eligible studies must report evidence of effectiveness of the task-shifting strategy



(i.e., clinical outcomes) by using a study design that statistically analyzes outcomes using a comparator/control.

*Study Exclusion Criteria:* 1. Studies that deliver care solely using a licensed or specialist/non-lay person (e.g., nurse, educator); 2. Studies focused solely on task-shifting a primarily medical task (e.g., HIV treatment, prenatal care); 3. Studies reporting psychological/behavioral treatments that have not been previously proven effective as outlined above, or not involving treatment (e.g., screening only); 4. Patient education studies with no behavioral intervention (e.g., nutritional information only); 5. Studies not involving a comparison; 6. Descriptive studies, case reports, or exclusively qualitative studies; 7. Studies not published in a peer-reviewed journal (e.g., dissertations, poster or paper presentations, newsletter articles); 8. Books and book chapters; 9. Study protocol publications.

#### *Types of participants*

*Participant Inclusion Criteria:* 1. Study participants must have received a psychological/behavioral-based (i.e., non-pharmacological) intervention for a “behavioral health” problem, broadly defined as any psychological/mental health problem (e.g., depression, eating disorder, parent-child behavioral issues, substance use) and/or physical health concern (e.g., chronic disease management, lifestyle changes, adherence); 2. Study participants must have received interventions delivered by non-licensed, non-specialists; 3. Study participants must be adults age 18 years and older.

*Participant Exclusion Criteria:* 1. Patients treated using pharmacological, surgical, or medical procedures as the primary intervention tested in the study; 2. Participants treated exclusively by licensed health professionals (e.g., physicians, nurses).

#### *Setting and timeframe*

*Inclusion Criteria for Setting and Timeframe:* 1. Task-shifting research studies conducted in high-, low- and middle-income countries; 2. Studies conducted in any setting (e.g., healthcare or community settings) or region (e.g., urban, rural).

*Exclusion Criteria for Setting and Timeframe:* Studies conducted prior to 2000 (i.e., the approximate time when task-shifting was first reported).

#### Report characteristics

#### *Information sources*

The search strategy will be adapted for each of the following sources/databases: PubMed, the Cochrane Library, Cochrane Central Register of Controlled Trials (CENTRAL), SCOPUS, Cumulative Index to Nursing and Allied Health Literature (CINAHL), APA PsycInfo, and Google Scholar. The search will cover the time frame from January 2000 to July 2020. Peer-reviewed published literature will be sought and posters, dissertations, presentations; descriptive or protocol articles; books and book chapters; studies not published in English will be excluded. Unpublished studies will not be sought. The search will be re-run prior to the final analysis and any further studies identified will be retrieved for inclusion.

#### *Search strategy*

The search strategy will be developed and overseen by a medical librarian in consultation with the primary researchers throughout the review (see supplementary files for PubMed search strategy example). Medical Subject Headings and free-text terms relating to lay health workers and the implementation of task-shifting/sharing will be included (see Table 2).

| <b><i>Key Words</i></b> | <b><i>Search Terms</i></b>                  |
|-------------------------|---------------------------------------------|
| <b>Task-Shifting</b>    | task-shifting; task-sharing; “care sharing” |

|                    |                                                                                                                                                                                                                                                                                                                                                                                                                                                                                      |
|--------------------|--------------------------------------------------------------------------------------------------------------------------------------------------------------------------------------------------------------------------------------------------------------------------------------------------------------------------------------------------------------------------------------------------------------------------------------------------------------------------------------|
| <b>Lay workers</b> | community health worker; church; community based facilitator; community based organization; health manpower; lay counsellor; lay counselor; lay health worker; non-licensed; nonprofessional; non-specialist; nonspecialists; patient care teams; patient navigator; peer; peer-coach; peer-counsellor; peer-counselor; peer-facilitator; promotor; promotora; promotoras; promotores; self care; self management; shared care; ; traditional healer; unlicensed                     |
| <b>EBPTs</b>       | psychological; psychological treatment; psychological intervention; empirically-supported psychological treatment; evidence-based psychological treatment; evidence-based behavioral treatment; evidence-based behavioural treatment; mental health; cognitive behavioral therapy; cognitive behavioural therapy; behavioral therapy; behavioural therapy; interpersonal therapy; acceptance and commitment therapy; psychotherapy; motivational interviewing; interpersonal therapy |

Table 2. Key word search terms.

### *Study screening and selection*

Using a coding guide and form, two reviewers will independently search titles and abstracts to remove publications not meeting inclusion criteria. Full texts will be retrieved. Multiple reports of the same study will be linked together (collated) per Cochrane guidelines (see Handbook sec 4.6.2)<sup>28</sup> so that the unit of interest is each study, not each article. For example, if a single study was split into separate publications such as a protocol paper, report of the actual study, a qualitative analysis on acceptability, and a follow-up, it will be counted as one study, and each of these articles will be searched for relevant data. We will examine prior reviews on the same topic and employ hand-searching of the reference lists for articles identified in the inclusion stage. We will iteratively refine our search strategy to refine the coding guide and form. We will add indexing terms as needed during the preliminary development of the inclusion article guide.

### *Data extraction*

A data extraction chart has been developed by the team to aid in extracting the specific task-shifting steps from the included articles (see supplementary files for example of study

1  
2  
3 extraction table). Data extracted will follow established definitions as described by Proctor and  
4  
5 colleagues.<sup>25 27</sup> Additional data we anticipate extracting include year of study publication;  
6  
7 design; setting; participant demographics; geographic location of study; type of personnel  
8  
9 delivering the intervention; demographics of personnel delivering intervention; and reported  
10  
11 effect sizes.  
12  
13

14  
15 Two co-authors will independently conduct data extraction and an additional author will  
16  
17 review the data extracted for completion and accuracy. When necessary, consensus will be  
18  
19 reached through discussions with an independent fourth author. Missing data will be sought out  
20  
21 by contacting study investigators for unreported data and/or additional details. Data will be  
22  
23 recorded in an Excel spreadsheet.  
24  
25

#### 26 *Assessing risk of bias*

27

28  
29 Reviewers will consider the quality of studies and risk of bias using the Cochrane  
30  
31 Collaboration's Risk of Bias (RoB 2) tool,<sup>29</sup> incorporating considerations for evaluating  
32  
33 psychotherapy outcome research.<sup>30</sup> Although the RoB 2 is focused on RCTs, it is applicable to  
34  
35 other types of study designs (e.g., quasi-experimental, pre-post).<sup>29</sup> All domains will be assessed,  
36  
37 including bias related to the randomization process, deviations from intended interventions,  
38  
39 missing outcome data, measurement of the outcome, selection of reported result, and overall  
40  
41 bias. Two authors will review and independently rate risk of bias in each domain as "low risk of  
42  
43 bias," "some concerns," or "high risk of bias." When necessary, disagreements will be resolved  
44  
45 by reaching consensus with a third reviewer.  
46  
47  
48

49  
50 Using the same procedures, we will evaluate publication bias by using the relevant section of  
51  
52 the Cochrane GRADE tool<sup>31</sup>, and also mitigate publication bias by searching as extensively as  
53  
54 possible using diverse databases, reviewing reference lists and any related systematic reviews.  
55  
56  
57  
58  
59  
60

1  
2  
3 While many systematic reviews grade evidence of a particular treatment, the purpose of this  
4 review is to identify specific methods; therefore, we are restricting our search to published  
5 literature only.  
6  
7  
8  
9

### 10 *Data synthesis and analysis*

11  
12 Data synthesis will primarily involve descriptive statistics with tables and graphs to  
13 visually communicate findings. Descriptive statistics will be employed to categorize and tally the  
14 different types of methodologies used in task-shifting studies, based on standardized language  
15 for operationalizing implementation strategies<sup>25</sup>, to include *actors, actions, action targets,*  
16 *implementation outcome affected, temporality, dose and justification.* Frequency counts and  
17 measures of central tendency will be included. We will report effect sizes for each study.  
18  
19

20 Although we are not grading evidence (i.e., incorporating all GRADE criteria<sup>32</sup>), we have  
21 developed strict inclusion criteria for rigor and quality as outlined above.  
22  
23  
24  
25

26 We will consider different subgroups of studies in our review, such as design, population,  
27 personnel delivering intervention, location of studies, and setting. Although this review is  
28 descriptive (no inferential statistical analyses are planned), different tables for each subgroup  
29 will be developed. Various subgroups are important to consider separately because differences  
30 are anticipated in methodologies depending on each subgroup, for example: design (randomized  
31 vs. non-randomized trial), population (those with physical health vs. mental health concerns),  
32 personnel delivering the intervention (community health worker vs. other lay personnel),  
33 location of studies (low-and middle-income countries vs. high-income countries), and setting  
34 (community vs. clinical or clinically-affiliated).  
35  
36  
37  
38  
39  
40  
41  
42  
43  
44  
45  
46  
47  
48  
49  
50

### 51 *Patient & Public Involvement*

1  
2  
3 Patients/public were not involved in choosing the methods or plans for dissemination of this  
4  
5 protocol. However, we will seek feedback on dissemination plans for the forthcoming systematic  
6  
7 review from our Community Health Worker Translational Advisory Board.  
8  
9

### 10 **Ethics and dissemination**

11  
12 This review will analyze data from published studies only, thus it will not require  
13  
14 Institutional Board Review. Any important protocol amendments will be documented in the  
15  
16 methods section of the planned systematic review manuscript. Findings will be presented at  
17  
18 conferences and published in a peer-reviewed journal.  
19  
20  
21  
22  
23  
24  
25  
26  
27  
28  
29  
30  
31  
32  
33  
34  
35  
36  
37  
38  
39  
40  
41  
42  
43  
44  
45  
46  
47  
48  
49  
50  
51  
52  
53  
54  
55  
56  
57  
58  
59  
60

**Author Contributions:**

KEK: literature search, study design, writing, critical revision, referencing; LSK: study design, writing, critical revision; JP: study design, writing, critical revision; LG: study design, writing; CG: search strategy; writing; ER: literature search, writing; EL: writing; critical revision; YJ-E: writing; critical revision; JEA: writing; critical revision; AR: study design; critical revision; JT: study design; critical revision; EF: study design, literature review, writing, critical revision.

**Funding statement:** This work was supported by the National Institute of Diabetes and Digestive and Kidney Diseases of the National Institutes of Health under Award Number K23DK123398 (PI: Kanzler) and by National Institute on Aging of the National Institutes of Health grant number K76AG060003-01A1 (PI: Kilpela). The content is solely the responsibility of the authors and does not necessarily represent the official views of the National Institutes of Health.

**Competing interests statement.** The authors have no competing interests to disclose.

## References

1. Kessler RC, Aguilar-Gaxiola S, Alonso J, et al. The global burden of mental disorders: an update from the WHO World Mental Health (WMH) surveys. *Epidemiology and Psychiatric Sciences* 2009;18(1):23-33.
2. Wang PS, Aguilar-Gaxiola S, Alonso J, et al. Use of mental health services for anxiety, mood, and substance disorders in 17 countries in the WHO world mental health surveys. *The Lancet* 2007;370(9590):841-50.
3. Kazdin AE, Blase SL. Rebooting psychotherapy research and practice to reduce the burden of mental illness. *Perspectives on psychological science* 2011;6(1):21-37.
4. Ogbeide S, Landoll R, Nielsen M, et al. To go or not go: Patient preference in seeking specialty mental health versus behavioral consultation within the primary care behavioral health consultation model. *Families, systems & health: the journal of collaborative family healthcare* 2018
5. Braveman PA, Cubbin C, Egerter S, et al. Socioeconomic disparities in health in the United States: what the patterns tell us. *American journal of public health* 2010;100(S1):S186-S96.
6. Pollack CE, Cubbin C, Sania A, et al. Do wealth disparities contribute to health disparities within racial/ethnic groups? *J Epidemiol Community Health* 2013;67(5):439-45.
7. Kazdin AE, Rabbitt SM. Novel models for delivering mental health services and reducing the burdens of mental illness. *Clinical Psychological Science* 2013;1(2):170-91.
8. World Health Organization. Task shifting: rational redistribution of tasks among health workforce teams: global recommendations and guidelines. 2007
9. Singla DR, Kohrt B, Murray LK, et al. Psychological treatments for the world: lessons from low-and middle-income countries. *Annual Review of Clinical Psychology* 2017;13(1)
10. Norris SL, Chowdhury FM, Van Le K, et al. Effectiveness of community health workers in the care of persons with diabetes. *Diabetic Medicine* 2006;23(5):544-56.
11. Scott K, Beckham S, Gross M, et al. What do we know about community-based health worker programs? A systematic review of existing reviews on community health workers. *Human resources for health* 2018;16(1):39.
12. Barnett ML, Gonzalez A, Miranda J, et al. Mobilizing community health workers to address mental health disparities for underserved populations: a systematic review. *Administration and Policy in Mental Health and Mental Health Services Research* 2018;45(2):195-211.
13. Barnett ML, Lau AS, Miranda J. Lay health worker involvement in evidence-based treatment delivery: a conceptual model to address disparities in care. *Annual review of clinical psychology* 2018;14:185-208.
14. Hoelt TJ, Fortney JC, Patel V, et al. Task-sharing approaches to improve mental health care in rural and other low-resource settings: a systematic review. *The Journal of rural health* 2018;34(1):48-62.
15. Bhaumik S, Moola S, Tyagi J, et al. Community health workers for pandemic response: a rapid evidence synthesis. *BMJ Global Health* 2020;5(6):e002769.
16. Boyce MR, Katz R. Community health workers and pandemic preparedness: current and prospective roles. *Frontiers in public health* 2019;7:62.



17. Kazdin AE. Innovations in Psychosocial Interventions and Their Delivery: Leveraging Cutting-Edge Science to Improve the World's Mental Health: Oxford University Press 2018.
18. Patel V, Weobong B, Weiss HA, et al. The Healthy Activity Program (HAP), a lay counsellor-delivered brief psychological treatment for severe depression, in primary care in India: a randomised controlled trial. *The Lancet* 2017;389(10065):176-85.
19. Dimidjian S, Hollon SD, Dobson KS, et al. Randomized trial of behavioral activation, cognitive therapy, and antidepressant medication in the acute treatment of adults with major depression. *Journal of consulting and clinical psychology* 2006;74(4):658.
20. Chibanda D, Mesu P, Kajawu L, et al. Problem-solving therapy for depression and common mental disorders in Zimbabwe: piloting a task-shifting primary mental health care intervention in a population with a high prevalence of people living with HIV. *BMC public health* 2011;11(1):828.
21. Nezu AM, Nezu CM, Perri MG. Problem-solving therapy for depression: Theory, research, and clinical guidelines: John Wiley & Sons 1989.
22. Bell AC, D'Zurilla TJ. Problem-solving therapy for depression: a meta-analysis. *Clinical psychology review* 2009;29(4):348-53.
23. Chibanda D, Weiss HA, Verhey R, et al. Effect of a primary care-based psychological intervention on symptoms of common mental disorders in Zimbabwe: a randomized clinical trial. *Jama* 2016;316(24):2618-26.
24. Chibanda D, Bowers T, Verhey R, et al. The Friendship Bench programme: a cluster randomised controlled trial of a brief psychological intervention for common mental disorders delivered by lay health workers in Zimbabwe. *International journal of mental health systems* 2015;9(1):21.
25. Proctor EK, Powell BJ, McMillen JC. Implementation strategies: recommendations for specifying and reporting. *Implementation Science* 2013;8(1):139.
26. Moher D, Shamseer L, Clarke M, et al. Preferred reporting items for systematic review and meta-analysis protocols (PRISMA-P) 2015 statement. *Systematic reviews* 2015;4(1):1.
27. Kirchner JE, Waltz TJ, Powell BJ, et al. Implementation strategies. *Dissemination and implementation research in health: translating science to practice* 2017;2:245-66.
28. Cochrane. Cochrane Handbook for Systematic Reviews of Interventions version 6.0 (updated July 2019). In: JPT H, J T, J C, et al., eds., 2019.
29. Sterne JA, Savović J, Page MJ, et al. RoB 2: a revised tool for assessing risk of bias in randomised trials. *bmj* 2019;366
30. Munder T, Barth J. Cochrane's risk of bias tool in the context of psychotherapy outcome research. *Psychotherapy Research* 2018;28(3):347-55.
31. Ryan R, Hill S. How to GRADE the quality of the evidence. *Cochrane consumers and communication group* 2016;2019
32. Grading of Recommendations A, Development and Evaluation (GRADE) Working Group, . . Handbook for grading the quality of evidence and the strength of recommendations using the GRADE approach. In: Schünemann H, Brożek J, Guyatt G, et al., eds., 2013.

Supplemental Material: Example Study Extraction

|                                         |                                                                                                                                                                                                                                                                                                                                                                                                        |                                                                                                                                                                                                                                                                                                                         |                                                                                         |                                                         |                                                 |                                                                                                                    |
|-----------------------------------------|--------------------------------------------------------------------------------------------------------------------------------------------------------------------------------------------------------------------------------------------------------------------------------------------------------------------------------------------------------------------------------------------------------|-------------------------------------------------------------------------------------------------------------------------------------------------------------------------------------------------------------------------------------------------------------------------------------------------------------------------|-----------------------------------------------------------------------------------------|---------------------------------------------------------|-------------------------------------------------|--------------------------------------------------------------------------------------------------------------------|
| <b>Study 1</b><br>Smith & Garza (2020). | <b>Design:</b> RCT<br><b>Setting:</b> Primary care clinic/academic medical center<br><b>Participant demographics:</b> Adults age 18-65, 60% women, 45% Hispanic/Latinx; 25% White non-Hispanic/Latinx, 6% Black, 4% other<br><b>Geographic location:</b> Southwestern US<br><b>Effect sizes:</b> Between group differences: $d=0.065$ (medium), Within-group difference (Active tx): $d=0.06$ (medium) |                                                                                                                                                                                                                                                                                                                         |                                                                                         |                                                         |                                                 |                                                                                                                    |
| <b>ACTIONS, TEMPORALITY &amp; DOSE</b>  | <b>Adaptations</b>                                                                                                                                                                                                                                                                                                                                                                                     | <b>Description:</b> Modified protocol from 6-week hour-long CBT for depression sessions in clinic to 6 modules of CBT basics delivered in homes by CHWs<br><br>1. Three one-hour focus groups<br>2. Modifications to CBT for depression protocol based on focus group feedback<br>3. Revisions of handouts and protocol | <i>Focus groups:</i> CHWs<br><br><i>Modifications &amp; materials:</i><br>Research team | CBT for depression protocol and handouts                | -Acceptability<br>-Adoption<br>-Appropriateness | <i>Focus groups:</i><br>Empirical & pragmatic<br><br><i>Modifications &amp; materials:</i> pragmatic justification |
|                                         | <b>Training</b>                                                                                                                                                                                                                                                                                                                                                                                        | 4. Training developed post-focus group<br>5. Two half-day workshop trainings<br>6. Pre-post knowledge tests                                                                                                                                                                                                             | Licensed Psychologists taught CHWs                                                      | Knowledge & skills of CHWs                              | -Feasibility                                    | Pragmatic                                                                                                          |
|                                         | <b>Implementation steps</b>                                                                                                                                                                                                                                                                                                                                                                            | 7. Established competency benchmarks<br>8. Implementation of program<br>9. Random selection of recordings (20%) for fidelity to competency benchmarks<br>10. Feedback with weekly supervision                                                                                                                           | Licensed psychologists listened to recordings/provided supervision to CHWs              | Primary care patients<br><br>CHWs                       | -Fidelity<br>-Uptake                            | Theoretical & empirical                                                                                            |
|                                         | <b>Sustainment</b>                                                                                                                                                                                                                                                                                                                                                                                     | 11. System hired supervising psychologist to provide weekly group supervision<br>12. Funding to sustain provided by clinic department                                                                                                                                                                                   | Administrators supported infrastructure change                                          | Program - CBT for depression delivered in homes by CHWs | -Sustainability & maintenance                   | Pragmatic                                                                                                          |

| Search Strategy: PubMed |                                                                                                                                                                                                                                                                                                                                                                                                                                                                                                                                                                                                                                                                                                                                                                                                                                                                                                                                                                                                                                                                                                                                                                                                                                                                                                                                                                                                                                                                                                                                                                                                                                                                                                                                                                                                                                                                                                                                                                                                                                                                                                                                                                                                                                                                                                                                                                                                                                                                                                                                                                                                                                                                                                                                                                                                                                                                                                                                                                                                                                                                                                                                                                                                                                                                                                                                                                                                                                                                                                                                                                                                                                                                                                                                                                                                                                                                                                                                                                                                                                                                                                                                                                                                                                                                                                                                                                                                                                                                                                                                                                                                                            | Results |
|-------------------------|----------------------------------------------------------------------------------------------------------------------------------------------------------------------------------------------------------------------------------------------------------------------------------------------------------------------------------------------------------------------------------------------------------------------------------------------------------------------------------------------------------------------------------------------------------------------------------------------------------------------------------------------------------------------------------------------------------------------------------------------------------------------------------------------------------------------------------------------------------------------------------------------------------------------------------------------------------------------------------------------------------------------------------------------------------------------------------------------------------------------------------------------------------------------------------------------------------------------------------------------------------------------------------------------------------------------------------------------------------------------------------------------------------------------------------------------------------------------------------------------------------------------------------------------------------------------------------------------------------------------------------------------------------------------------------------------------------------------------------------------------------------------------------------------------------------------------------------------------------------------------------------------------------------------------------------------------------------------------------------------------------------------------------------------------------------------------------------------------------------------------------------------------------------------------------------------------------------------------------------------------------------------------------------------------------------------------------------------------------------------------------------------------------------------------------------------------------------------------------------------------------------------------------------------------------------------------------------------------------------------------------------------------------------------------------------------------------------------------------------------------------------------------------------------------------------------------------------------------------------------------------------------------------------------------------------------------------------------------------------------------------------------------------------------------------------------------------------------------------------------------------------------------------------------------------------------------------------------------------------------------------------------------------------------------------------------------------------------------------------------------------------------------------------------------------------------------------------------------------------------------------------------------------------------------------------------------------------------------------------------------------------------------------------------------------------------------------------------------------------------------------------------------------------------------------------------------------------------------------------------------------------------------------------------------------------------------------------------------------------------------------------------------------------------------------------------------------------------------------------------------------------------------------------------------------------------------------------------------------------------------------------------------------------------------------------------------------------------------------------------------------------------------------------------------------------------------------------------------------------------------------------------------------------------------------------------------------------------------------------------------|---------|
| 10                      | #9 NOT (telemedicine OR telehealth OR telepsychiatry)                                                                                                                                                                                                                                                                                                                                                                                                                                                                                                                                                                                                                                                                                                                                                                                                                                                                                                                                                                                                                                                                                                                                                                                                                                                                                                                                                                                                                                                                                                                                                                                                                                                                                                                                                                                                                                                                                                                                                                                                                                                                                                                                                                                                                                                                                                                                                                                                                                                                                                                                                                                                                                                                                                                                                                                                                                                                                                                                                                                                                                                                                                                                                                                                                                                                                                                                                                                                                                                                                                                                                                                                                                                                                                                                                                                                                                                                                                                                                                                                                                                                                                                                                                                                                                                                                                                                                                                                                                                                                                                                                                      | 137     |
| 9                       | #8 NOT ((qualitative study [ti] OR qualitative studies [ti]) OR (((("Semi-structured" [TIAB] OR semistructured [TIAB] OR unstructured [TIAB] OR informal [TIAB] OR "in-depth" [TIAB] OR indepth [TIAB] OR "face-to-face" [TIAB ] OR structured [TIAB] OR guide [TIAB] OR guides [TIAB]) AND (interview* [TIAB] OR discussion* [TIAB] OR questionnaire* [TIAB])) OR ("focus group" [TIAB] OR "focus groups "[TIAB] OR qualitative [TIAB] OR ethnograph* [TIAB] OR fieldwork [TIAB] OR "field work"[TIAB] OR "key informant" [TIAB])) OR "interviews as topic" [Mesh] OR "focus groups" [Mesh] OR narration [Mesh] OR qualitative research [Mesh] OR "personal narratives as topic"[Mesh]))                                                                                                                                                                                                                                                                                                                                                                                                                                                                                                                                                                                                                                                                                                                                                                                                                                                                                                                                                                                                                                                                                                                                                                                                                                                                                                                                                                                                                                                                                                                                                                                                                                                                                                                                                                                                                                                                                                                                                                                                                                                                                                                                                                                                                                                                                                                                                                                                                                                                                                                                                                                                                                                                                                                                                                                                                                                                                                                                                                                                                                                                                                                                                                                                                                                                                                                                                                                                                                                                                                                                                                                                                                                                                                                                                                                                                                                                                                                                  | 141     |
| 8                       | #7 NOT ((case reports [pt] OR comment [pt] OR editorial [pt] OR letter [pt] OR news [pt]))                                                                                                                                                                                                                                                                                                                                                                                                                                                                                                                                                                                                                                                                                                                                                                                                                                                                                                                                                                                                                                                                                                                                                                                                                                                                                                                                                                                                                                                                                                                                                                                                                                                                                                                                                                                                                                                                                                                                                                                                                                                                                                                                                                                                                                                                                                                                                                                                                                                                                                                                                                                                                                                                                                                                                                                                                                                                                                                                                                                                                                                                                                                                                                                                                                                                                                                                                                                                                                                                                                                                                                                                                                                                                                                                                                                                                                                                                                                                                                                                                                                                                                                                                                                                                                                                                                                                                                                                                                                                                                                                 | 230     |
| 7                       | #5 NOT (protocol [ti]) Filters: English, from 2000-2020                                                                                                                                                                                                                                                                                                                                                                                                                                                                                                                                                                                                                                                                                                                                                                                                                                                                                                                                                                                                                                                                                                                                                                                                                                                                                                                                                                                                                                                                                                                                                                                                                                                                                                                                                                                                                                                                                                                                                                                                                                                                                                                                                                                                                                                                                                                                                                                                                                                                                                                                                                                                                                                                                                                                                                                                                                                                                                                                                                                                                                                                                                                                                                                                                                                                                                                                                                                                                                                                                                                                                                                                                                                                                                                                                                                                                                                                                                                                                                                                                                                                                                                                                                                                                                                                                                                                                                                                                                                                                                                                                                    | 239     |
| 6                       | #5 NOT (protocol [ti])                                                                                                                                                                                                                                                                                                                                                                                                                                                                                                                                                                                                                                                                                                                                                                                                                                                                                                                                                                                                                                                                                                                                                                                                                                                                                                                                                                                                                                                                                                                                                                                                                                                                                                                                                                                                                                                                                                                                                                                                                                                                                                                                                                                                                                                                                                                                                                                                                                                                                                                                                                                                                                                                                                                                                                                                                                                                                                                                                                                                                                                                                                                                                                                                                                                                                                                                                                                                                                                                                                                                                                                                                                                                                                                                                                                                                                                                                                                                                                                                                                                                                                                                                                                                                                                                                                                                                                                                                                                                                                                                                                                                     | 245     |
| 5                       | #3 AND #4<br>("psychologic"[All Fields] OR "psychological"[All Fields] OR "psychologically"[All Fields] OR "psychologization"[All Fields] OR "psychologized"[All Fields] OR "psychologizing"[All Fields]) OR (("psychologic"[All Fields] OR "psychological"[All Fields] OR "psychologically"[All Fields] OR "psychologization"[All Fields] OR "psychologized"[All Fields] OR "psychologizing"[All Fields]) AND ("therapeutics"[MeSH Terms] OR "therapeutics"[All Fields] OR "treatments"[All Fields] OR "therapy"[MeSH Subheading] OR "therapy"[All Fields] OR "treatment"[All Fields] OR "treatment s"[All Fields]) OR "psychological treatment"[All Fields]) OR ((("psychologic"[All Fields] OR "psychological"[All Fields] OR "psychologically"[All Fields] OR "psychologization"[All Fields] OR "psychologized"[All Fields] OR "psychologizing"[All Fields]) AND ("intervention s"[All Fields] OR "interventions"[All Fields] OR "interventive"[All Fields] OR "methods"[MeSH Terms] OR "methods"[All Fields] OR "intervention"[All Fields] OR "interventional"[All Fields]) OR "psychological intervention") OR "empirically-supported"[All Fields] AND ("psychologic"[All Fields] OR "psychological"[All Fields] OR "psychologically"[All Fields] OR "psychologization"[All Fields] OR "psychologized"[All Fields] OR "psychologizing"[All Fields]) AND ("therapeutics"[MeSH Terms] OR "therapeutics"[All Fields] OR "treatments"[All Fields] OR "therapy"[MeSH Subheading] OR "therapy"[All Fields] OR "treatment"[All Fields] OR "treatment s"[All Fields]) OR "empirically-supported psychological treatment"[All Fields] OR ("evidence-based"[All Fields] AND ("psychologic"[All Fields] OR "psychological"[All Fields] OR "psychologically"[All Fields] OR "psychologization"[All Fields] OR "psychologized"[All Fields] OR "psychologizing"[All Fields]) AND ("therapeutics"[MeSH Terms] OR "therapeutics"[All Fields] OR "treatments"[All Fields] OR "therapy"[MeSH Subheading] OR "therapy"[All Fields] OR "treatment"[All Fields] OR "treatment s"[All Fields]) OR "evidence-based psychological treatment") OR ("evidence-based"[All Fields] AND ("behavior therapy"[MeSH Terms] OR ("behavior"[All Fields] AND "therapy"[All Fields]) OR "behavior therapy"[All Fields] OR ("behavioral"[All Fields] AND "treatment"[All Fields]) OR "behavioral treatment"[All Fields]) OR "evidence-based behavioral treatment") OR ("evidence-based"[All Fields] AND ("behavior therapy"[MeSH Terms] OR ("behavior"[All Fields] AND "therapy"[All Fields]) OR "behavior therapy"[All Fields] OR ("behavioural"[All Fields] AND "treatment"[All Fields]) OR "behavioural treatment"[All Fields]) OR "evidence-based behavioural treatment"[All Fields]) OR ("mental health"[MeSH Terms] OR ("mental"[All Fields] AND "health"[All Fields]) OR "mental health"[All Fields]) OR ("cognitive behavioral therapy"[MeSH Terms] OR ("cognitive"[All Fields] AND "behavioral"[All Fields] AND "therapy"[All Fields]) OR "cognitive behavioral therapy"[All Fields]) OR ("cognitive behavioral therapy"[MeSH Terms] OR ("cognitive"[All Fields] AND "behavioural"[All Fields] AND "therapy"[All Fields]) OR "cognitive behavioural therapy"[All Fields]) OR ("behavior therapy"[MeSH Terms] OR ("behavior"[All Fields] AND "therapy"[All Fields]) OR "behavior therapy"[All Fields] OR ("behavioral"[All Fields] AND "therapy"[All Fields]) OR "behavioral therapy"[All Fields]) OR ("behavior therapy"[MeSH Terms] OR ("behavior"[All Fields] AND "therapy"[All Fields]) OR "behavior therapy"[All Fields] OR ("behavioural"[All Fields] AND "therapy"[All Fields]) OR "behavioural therapy"[All Fields]) OR (("interpersonal"[All Fields] OR "interpersonality"[All Fields] OR "interpersonally"[All Fields]) AND ("therapeutics"[MeSH Terms] OR "therapeutics"[All Fields] OR "therapies"[All Fields] OR "therapy"[MeSH Subheading] OR "therapy"[All Fields] OR "therapy s"[All Fields] OR "therapys"[All Fields]) OR "interpersonal therapy"[All Fields] OR "interpersonal therapies"[All Fields]) OR ("acceptance and commitment therapy"[MeSH Terms] OR ("acceptance"[All Fields] AND "commitment"[All Fields] AND "therapy"[All Fields]) OR "acceptance and commitment therapy"[All Fields]) OR ("psychotherapie"[All Fields] OR "psychotherapy"[MeSH Terms] OR "psychotherapy"[All Fields] OR "psychotherapies"[All Fields] OR "psychotherapy s"[All Fields]) OR ("motivational interviewing"[MeSH Terms] OR ("motivational"[All Fields] AND "interviewing"[All Fields]) OR "motivational interviewing"[All Fields]) OR | 268     |
| 4                       | interviewing"[MeSH Terms] OR ("motivational"[All Fields] AND "interviewing"[All Fields]) OR "motivational interviewing"[All Fields]) OR                                                                                                                                                                                                                                                                                                                                                                                                                                                                                                                                                                                                                                                                                                                                                                                                                                                                                                                                                                                                                                                                                                                                                                                                                                                                                                                                                                                                                                                                                                                                                                                                                                                                                                                                                                                                                                                                                                                                                                                                                                                                                                                                                                                                                                                                                                                                                                                                                                                                                                                                                                                                                                                                                                                                                                                                                                                                                                                                                                                                                                                                                                                                                                                                                                                                                                                                                                                                                                                                                                                                                                                                                                                                                                                                                                                                                                                                                                                                                                                                                                                                                                                                                                                                                                                                                                                                                                                                                                                                                    | 926,979 |

Key Words

EBPT

|    |                                                                                                                                                                                                                                                                                                           |         |               |
|----|-----------------------------------------------------------------------------------------------------------------------------------------------------------------------------------------------------------------------------------------------------------------------------------------------------------|---------|---------------|
| 1  | ((("interpersonal"[All Fields] OR "interpersonality"[All Fields] OR "interpersonally"[All Fields]) AND ("therapeutics"[MeSH Terms] OR "therapeutics"[All Fields] OR "therapies"[All Fields] OR "therapy"[MeSH Subheading] OR "therapy"[All Fields] OR "therapy s"[All Fields] OR "therapys"[All Fields])) |         |               |
| 2  |                                                                                                                                                                                                                                                                                                           |         |               |
| 3  | 3 #1 AND #2                                                                                                                                                                                                                                                                                               | 1,019   |               |
| 4  |                                                                                                                                                                                                                                                                                                           |         |               |
| 5  | 2 "task sharing"[All Fields] OR "task shifting"[All Fields] OR "care sharing"[All Fields]                                                                                                                                                                                                                 | 1,491   | Task-shifting |
| 6  | ((("community health workers"[MeSH Terms] OR ("community"[All Fields] AND "health"[All Fields] AND "workers"[All Fields]) OR "community health workers"[All Fields] OR ("community"[All Fields] AND "health"[All Fields] AND "worker"[All Fields]) or "community health worker"[All Fields])) OR          |         |               |
| 7  | ((("church"[All Fields] OR "church s"[All Fields] OR "churches"[All Fields])) OR (((("community"[All Fields] AND ("facilitate"[All Fields] OR                                                                                                                                                             |         |               |
| 8  | "facilitated"[All Fields] OR "facilitates"[All Fields] OR "facilitating"[All Fields] OR "facilitation"[All Fields] OR "facilitations"[All Fields] OR                                                                                                                                                      |         |               |
| 9  | "facilitative"[All Fields] OR "facilitator"[All Fields] OR "facilitator s"[All Fields] OR "facilitators"[All Fields])) OR "community based facilitator"[All                                                                                                                                               |         |               |
| 10 | Fields)) OR (((("community"[All Fields] AND ("organisation"[All Fields] OR "organization and administration"[MeSH Subheading] OR                                                                                                                                                                          |         |               |
| 11 | ("organization"[All Fields])) OR "community based organization" [All Fields]) OR ("health workforce"[MeSH Terms] OR ("health"[All Fields] AND                                                                                                                                                             |         |               |
| 12 | "workforce"[All Fields]) OR "health workforce"[All Fields] OR ("health"[All Fields] AND "manpower"[All Fields]) OR "health manpower"[All Fields]) OR                                                                                                                                                      |         |               |
| 13 | ("lay"[All Fields] AND ("counsellor"[All Fields] OR "counselors"[MeSH Terms] OR "counselors"[All Fields] OR "counselor"[All Fields] OR                                                                                                                                                                    |         |               |
| 14 | "counseling"[MeSH Terms] OR "counseling"[All Fields] OR "counsellor s"[All Fields] OR "counsellors"[All Fields] OR "counselor s"[All Fields]) OR "lay                                                                                                                                                     |         |               |
| 15 | counselor" [All Fields] OR "lay counsellor"[All Fields]) OR ("lay"[All Fields] AND ("health"[MeSH Terms] OR "health"[All Fields] OR "health s"[All                                                                                                                                                        |         |               |
| 16 | Fields)) AND ("occupational groups"[MeSH Terms] OR ("occupational"[All Fields] AND "groups"[All Fields]) OR "occupational groups"[All Fields] OR                                                                                                                                                          |         |               |
| 17 | "worker"[All Fields] OR "workers"[All Fields] OR "worker s"[All Fields]) OR "lay health worker" [All Fields]) OR ("non"[All Fields] AND ("licence"[All                                                                                                                                                    |         |               |
| 18 | Fields] OR "licensure"[MeSH Terms] OR "licensure"[All Fields] OR "license"[All Fields] OR "licenced"[All Fields] OR "licences"[All Fields] OR                                                                                                                                                             |         |               |
| 19 | "licencing"[All Fields] OR "licensed"[All Fields] OR "licenses"[All Fields] OR "licensing"[All Fields] OR "non-licensed"[All Fields] OR "nonlicensed" [All                                                                                                                                                |         |               |
| 20 | Fields] OR "non-licenced" [All Fields] OR "nonlicenced" [All Fields]) OR ("nonprofessional"[All Fields] OR "nonprofessionals"[All Fields]) OR ("non-                                                                                                                                                      |         |               |
| 21 | specialist" [All Fields] OR "non-specialists" [All Fields] OR "nonspecialist" [All Fields] OR "nonspecialists" [All Fields]) OR ("patient care team"[MeSH                                                                                                                                                 |         |               |
| 22 | Terms] OR ("patient"[All Fields] AND "care"[All Fields] AND "team"[All Fields]) OR "patient care team"[All Fields] OR ("patient"[All Fields] AND                                                                                                                                                          |         |               |
| 23 | "care"[All Fields] AND "teams"[All Fields]) OR "patient care teams"[All Fields]) OR ("patient navigation"[MeSH Terms] OR ("patient"[All Fields] AND                                                                                                                                                       |         |               |
| 24 | "navigation"[All Fields]) OR "patient navigation"[All Fields] OR ("patient"[All Fields] AND "navigator"[All Fields]) OR "patient navigator"[All Fields])                                                                                                                                                  |         |               |
| 25 | OR ("peer" [all fields]) OR ("peer-coach" [all fields]) OR ("peer-counselor"[All Fields]) OR ("peer-counsellor"[All Fields]) OR ("peer-facilitator"[All                                                                                                                                                   |         |               |
| 26 | Fields]) OR ("promotor"[All Fields] OR "promotors"[All Fields]) OR ("promotora"[All Fields] OR "promotoras"[All Fields]) OR ("promotores"[All Fields])                                                                                                                                                    |         |               |
| 27 | OR ("self care"[MeSH Terms] OR ("self"[All Fields] AND "care"[All Fields]) OR "self care"[All Fields]) OR ("self management"[MeSH Terms] OR "self                                                                                                                                                         |         |               |
| 28 | management"[All Fields] OR ("self"[All Fields] AND "management"[All Fields]) OR "self management"[All Fields]) OR ("share"[All Fields] OR                                                                                                                                                                 |         |               |
| 29 | "shared"[All Fields] OR "shares"[All Fields] OR "sharing"[All Fields] OR "sharings"[All Fields]) AND "care"[All Fields] OR "shared care" [All Fields]) OR                                                                                                                                                 |         |               |
| 30 | ((("tradition"[All Fields] OR "tradition s"[All Fields] OR "traditional"[All Fields] OR "traditional s"[All Fields] OR "traditions"[All Fields]) AND ("healer"[All                                                                                                                                        |         |               |
| 31 | Fields] OR "healer s"[All Fields] OR "healers"[All Fields]) OR "traditional healer"[All Fields]) OR ("unlicensed"[All Fields] OR ("nonphysician"[All Fields]                                                                                                                                              |         |               |
| 32 | OR "nonphysicians"[All Fields]) OR ((("physician"[All Fields] AND "extender"[All Fields]) OR "physician extender"[All Fields]) OR ("CHW"[all fields])                                                                                                                                                     | 767,391 | Lay worker    |
| 33 |                                                                                                                                                                                                                                                                                                           |         |               |
| 34 |                                                                                                                                                                                                                                                                                                           |         |               |
| 35 |                                                                                                                                                                                                                                                                                                           |         |               |
| 36 |                                                                                                                                                                                                                                                                                                           |         |               |
| 37 |                                                                                                                                                                                                                                                                                                           |         |               |
| 38 |                                                                                                                                                                                                                                                                                                           |         |               |
| 39 |                                                                                                                                                                                                                                                                                                           |         |               |
| 40 |                                                                                                                                                                                                                                                                                                           |         |               |
| 41 |                                                                                                                                                                                                                                                                                                           |         |               |
| 42 |                                                                                                                                                                                                                                                                                                           |         |               |
| 43 |                                                                                                                                                                                                                                                                                                           |         |               |
| 44 |                                                                                                                                                                                                                                                                                                           |         |               |
| 45 |                                                                                                                                                                                                                                                                                                           |         |               |
| 46 |                                                                                                                                                                                                                                                                                                           |         |               |
| 47 |                                                                                                                                                                                                                                                                                                           |         |               |

# Reporting checklist for protocol of a systematic review.

Based on the PRISMA-P guidelines.

## Instructions to authors

Complete this checklist by entering the page numbers from your manuscript where readers will find each of the items listed below.

Your article may not currently address all the items on the checklist. Please modify your text to include the missing information. If you are certain that an item does not apply, please write "n/a" and provide a short explanation.

Upload your completed checklist as an extra file when you submit to a journal.

In your methods section, say that you used the PRISMA-Reporting guidelines, and cite them as:

Moher D, Shamseer L, Clarke M, Ghersi D, Liberati A, Petticrew M, Shekelle P, Stewart LA. Preferred Reporting Items for Systematic Review and Meta-Analysis Protocols (PRISMA-P) 2015 statement. *Syst Rev.* 2015;4(1):1.

| Reporting Item      |                                                                                                                                                               | Page Number |
|---------------------|---------------------------------------------------------------------------------------------------------------------------------------------------------------|-------------|
| <b>Title</b>        |                                                                                                                                                               |             |
| Identification      | <a href="#">#1a</a> Identify the report as a protocol of a systematic review                                                                                  | 1           |
| Update              | <a href="#">#1b</a> If the protocol is for an update of a previous systematic review, identify as such                                                        | N/A         |
| <b>Registration</b> |                                                                                                                                                               |             |
|                     | <a href="#">#2</a> If registered, provide the name of the registry (such as PROSPERO) and registration number                                                 | N/A         |
| <b>Authors</b>      |                                                                                                                                                               |             |
| Contact             | <a href="#">#3a</a> Provide name, institutional affiliation, e-mail address of all protocol authors; provide physical mailing address of corresponding author | 1-2         |
| Contribution        | <a href="#">#3b</a> Describe contributions of protocol authors and identify the guarantor of the review                                                       | 14          |

## Amendments

|    |                      |                                                                                               |        |
|----|----------------------|-----------------------------------------------------------------------------------------------|--------|
| 1  | <a href="#">#4</a>   | If the protocol represents an amendment of a previously completed                             | 12     |
| 2  |                      | or published protocol, identify as such and list changes; otherwise,                          |        |
| 3  |                      | state plan for documenting important protocol amendments                                      |        |
| 4  |                      |                                                                                               |        |
| 5  |                      |                                                                                               |        |
| 6  | <b>Support</b>       |                                                                                               |        |
| 7  |                      |                                                                                               |        |
| 8  | Sources              | <a href="#">#5a</a> Indicate sources of financial or other support for the review             | 13     |
| 9  |                      |                                                                                               |        |
| 10 | Sponsor              | <a href="#">#5b</a> Provide name for the review funder and / or sponsor                       | 13     |
| 11 |                      |                                                                                               |        |
| 12 | Role of sponsor or   | <a href="#">#5c</a> Describe roles of funder(s), sponsor(s), and / or institution(s), if any, | N/A    |
| 13 | funder               | in developing the protocol                                                                    |        |
| 14 |                      |                                                                                               |        |
| 15 |                      |                                                                                               |        |
| 16 | <b>Introduction</b>  |                                                                                               |        |
| 17 |                      |                                                                                               |        |
| 18 | Rationale            | <a href="#">#6</a> Describe the rationale for the review in the context of what is            | 4-6    |
| 19 |                      | already known                                                                                 |        |
| 20 |                      |                                                                                               |        |
| 21 | Objectives           | <a href="#">#7</a> Provide an explicit statement of the question(s) the review will           | 6      |
| 22 |                      | address with reference to participants, interventions, comparators,                           |        |
| 23 |                      | and outcomes (PICO)                                                                           |        |
| 24 |                      |                                                                                               |        |
| 25 |                      |                                                                                               |        |
| 26 |                      |                                                                                               |        |
| 27 |                      |                                                                                               |        |
| 28 | <b>Methods</b>       |                                                                                               |        |
| 29 |                      |                                                                                               |        |
| 30 | Eligibility criteria | <a href="#">#8</a> Specify the study characteristics (such as PICO, study design,             | 7-9    |
| 31 |                      | setting, time frame) and report characteristics (such as years                                |        |
| 32 |                      | considered, language, publication status) to be used as criteria for                          |        |
| 33 |                      | eligibility for the review                                                                    |        |
| 34 |                      |                                                                                               |        |
| 35 | Information sources  | <a href="#">#9</a> Describe all intended information sources (such as electronic              | 9      |
| 36 |                      | databases, contact with study authors, trial registers or other grey                          |        |
| 37 |                      | literature sources) with planned dates of coverage                                            |        |
| 38 |                      |                                                                                               |        |
| 39 | Search strategy      | <a href="#">#10</a> Present draft of search strategy to be used for at least one electronic   | 9-10 & |
| 40 |                      | database, including planned limits, such that it could be repeated                            | Suppl  |
| 41 |                      |                                                                                               |        |
| 42 |                      |                                                                                               |        |
| 43 | Study records - data | <a href="#">#11a</a> Describe the mechanism(s) that will be used to manage records and        | 10-11  |
| 44 | management           | data throughout the review                                                                    |        |
| 45 |                      |                                                                                               |        |
| 46 | Study records -      | <a href="#">#11b</a> State the process that will be used for selecting studies (such as two   | 10-11  |
| 47 | selection process    | independent reviewers) through each phase of the review (that is,                             |        |
| 48 |                      | screening, eligibility and inclusion in meta-analysis)                                        |        |
| 49 |                      |                                                                                               |        |
| 50 |                      |                                                                                               |        |
| 51 |                      |                                                                                               |        |
| 52 |                      |                                                                                               |        |
| 53 |                      |                                                                                               |        |
| 54 |                      |                                                                                               |        |
| 55 |                      |                                                                                               |        |
| 56 |                      |                                                                                               |        |
| 57 |                      |                                                                                               |        |
| 58 |                      |                                                                                               |        |
| 59 |                      |                                                                                               |        |
| 60 |                      |                                                                                               |        |

|    |                      |                      |                                                                       |       |
|----|----------------------|----------------------|-----------------------------------------------------------------------|-------|
| 1  | Study records - data | <a href="#">#11c</a> | Describe planned method of extracting data from reports (such as      | 10-11 |
| 2  | collection process   |                      | piloting forms, done independently, in duplicate), any processes for  |       |
| 3  |                      |                      | obtaining and confirming data from investigators                      |       |
| 4  |                      |                      |                                                                       |       |
| 5  |                      |                      |                                                                       |       |
| 6  | Data items           | <a href="#">#12</a>  | List and define all variables for which data will be sought (such as  | 10-11 |
| 7  |                      |                      | PICO items, funding sources), any pre-planned data assumptions        |       |
| 8  |                      |                      | and simplifications                                                   |       |
| 9  |                      |                      |                                                                       |       |
| 10 |                      |                      |                                                                       |       |
| 11 | Outcomes and         | <a href="#">#13</a>  | List and define all outcomes for which data will be sought,           | 11-12 |
| 12 | prioritization       |                      | including prioritization of main and additional outcomes, with        |       |
| 13 |                      |                      | rationale                                                             |       |
| 14 |                      |                      |                                                                       |       |
| 15 |                      |                      |                                                                       |       |
| 16 |                      |                      |                                                                       |       |
| 17 | Risk of bias in      | <a href="#">#14</a>  | Describe anticipated methods for assessing risk of bias of individual | 11    |
| 18 | individual studies   |                      | studies, including whether this will be done at the outcome or study  |       |
| 19 |                      |                      | level, or both; state how this information will be used in data       |       |
| 20 |                      |                      | synthesis                                                             |       |
| 21 |                      |                      |                                                                       |       |
| 22 |                      |                      |                                                                       |       |
| 23 | Data synthesis       | <a href="#">#15a</a> | Describe criteria under which study data will be quantitatively       | 12    |
| 24 |                      |                      | synthesised                                                           |       |
| 25 |                      |                      |                                                                       |       |
| 26 |                      |                      |                                                                       |       |
| 27 | Data synthesis       | <a href="#">#15b</a> | If data are appropriate for quantitative synthesis, describe planned  | N/A   |
| 28 |                      |                      | summary measures, methods of handling data and methods of             |       |
| 29 |                      |                      | combining data from studies, including any planned exploration of     |       |
| 30 |                      |                      | consistency (such as I <sup>2</sup> , Kendall's $\tau$ )              |       |
| 31 |                      |                      |                                                                       |       |
| 32 |                      |                      |                                                                       |       |
| 33 |                      |                      |                                                                       |       |
| 34 | Data synthesis       | <a href="#">#15c</a> | Describe any proposed additional analyses (such as sensitivity or     | N/A   |
| 35 |                      |                      | subgroup analyses, meta-regression)                                   |       |
| 36 |                      |                      |                                                                       |       |
| 37 |                      |                      |                                                                       |       |
| 38 | Data synthesis       | <a href="#">#15d</a> | If quantitative synthesis is not appropriate, describe the type of    | 12    |
| 39 |                      |                      | summary planned                                                       |       |
| 40 |                      |                      |                                                                       |       |
| 41 |                      |                      |                                                                       |       |
| 42 | Meta-bias(es)        | <a href="#">#16</a>  | Specify any planned assessment of meta-bias(es) (such as              | 12    |
| 43 |                      |                      | publication bias across studies, selective reporting within studies)  |       |
| 44 |                      |                      |                                                                       |       |
| 45 |                      |                      |                                                                       |       |
| 46 | Confidence in        | <a href="#">#17</a>  | Describe how the strength of the body of evidence will be assessed    | 11-12 |
| 47 | cumulative           |                      | (such as GRADE)                                                       |       |
| 48 | evidence             |                      |                                                                       |       |
| 49 |                      |                      |                                                                       |       |
| 50 |                      |                      |                                                                       |       |

The PRISMA-P checklist is distributed under the terms of the Creative Commons Attribution License CC-BY 4.0. This checklist was completed on 19. August 2020 using <https://www.goodreports.org/>, a tool made by the [EQUATOR Network](#) in collaboration with [Penelope.ai](#)
